# Supplementary material
Source: publisher site journal article supplement (https://www.dovepress.com/article/574531)
Supplement: Supplementary file 1 [file 574531%20supplementary%20material.pdf]

**Supplementary Table S1. Trends in the number of cases and age-standardized rates of schizophrenia by sex in China, 1990–2023**

| measure   | location | sex  | age              | cause         | metric | year | val    | upper  | lower  |
|-----------|----------|------|------------------|---------------|--------|------|--------|--------|--------|
| Incidence | China    | Male | All ages         | Schizophrenia | Number | 1990 | 152989 | 182808 | 129743 |
| Incidence | China    | Male | All ages         | Schizophrenia | Number | 1991 | 155605 | 186341 | 131543 |
| Incidence | China    | Male | All ages         | Schizophrenia | Number | 1992 | 157577 | 188638 | 133193 |
| Incidence | China    | Male | All ages         | Schizophrenia | Number | 1993 | 159030 | 189988 | 133897 |
| Incidence | China    | Male | All ages         | Schizophrenia | Number | 1994 | 160073 | 191377 | 134279 |
| Incidence | China    | Male | All ages         | Schizophrenia | Number | 1995 | 160686 | 191552 | 134271 |
| Incidence | China    | Male | All ages         | Schizophrenia | Number | 1996 | 160946 | 191617 | 134393 |
| Incidence | China    | Male | All ages         | Schizophrenia | Number | 1997 | 161016 | 191412 | 134521 |
| Incidence | China    | Male | All ages         | Schizophrenia | Number | 1998 | 161216 | 191222 | 134796 |
| Incidence | China    | Male | All ages         | Schizophrenia | Number | 1999 | 161783 | 191401 | 135439 |
| Incidence | China    | Male | All ages         | Schizophrenia | Number | 2000 | 162712 | 192364 | 136583 |
| Incidence | China    | Male | All ages         | Schizophrenia | Number | 2001 | 163983 | 194001 | 138356 |
| Incidence | China    | Male | All ages         | Schizophrenia | Number | 2002 | 165470 | 195555 | 140039 |
| Incidence | China    | Male | All ages         | Schizophrenia | Number | 2003 | 167204 | 197258 | 141485 |
| Incidence | China    | Male | All ages         | Schizophrenia | Number | 2004 | 169219 | 200304 | 143090 |
| Incidence | China    | Male | All ages         | Schizophrenia | Number | 2005 | 171356 | 202117 | 145059 |
| Incidence | China    | Male | All ages         | Schizophrenia | Number | 2006 | 173482 | 203830 | 146750 |
| Incidence | China    | Male | All ages         | Schizophrenia | Number | 2007 | 175513 | 206279 | 149057 |
| Incidence | China    | Male | All ages         | Schizophrenia | Number | 2008 | 177388 | 207724 | 150960 |
| Incidence | China    | Male | All ages         | Schizophrenia | Number | 2009 | 178970 | 209410 | 152360 |
| Incidence | China    | Male | All ages         | Schizophrenia | Number | 2010 | 180220 | 211087 | 153221 |
| Incidence | China    | Male | All ages         | Schizophrenia | Number | 2011 | 180888 | 212173 | 153272 |
| Incidence | China    | Male | All ages         | Schizophrenia | Number | 2012 | 181021 | 212413 | 152679 |
| Incidence | China    | Male | All ages         | Schizophrenia | Number | 2013 | 180751 | 212582 | 152654 |
| Incidence | China    | Male | All ages         | Schizophrenia | Number | 2014 | 180108 | 212260 | 152563 |
| Incidence | China    | Male | All ages         | Schizophrenia | Number | 2015 | 179479 | 211013 | 152472 |
| Incidence | China    | Male | All ages         | Schizophrenia | Number | 2016 | 178858 | 210515 | 152511 |
| Incidence | China    | Male | All ages         | Schizophrenia | Number | 2017 | 178248 | 210000 | 152211 |
| Incidence | China    | Male | All ages         | Schizophrenia | Number | 2018 | 177666 | 209483 | 151874 |
| Incidence | China    | Male | All ages         | Schizophrenia | Number | 2019 | 177013 | 208926 | 151011 |
| Incidence | China    | Male | All ages         | Schizophrenia | Number | 2020 | 176459 | 208180 | 149994 |
| Incidence | China    | Male | All ages         | Schizophrenia | Number | 2021 | 175781 | 206777 | 149132 |
| Incidence | China    | Male | All ages         | Schizophrenia | Number | 2022 | 175196 | 205280 | 148200 |
| Incidence | China    | Male | All ages         | Schizophrenia | Number | 2023 | 174592 | 202989 | 147864 |
| Incidence | China    | Male | Age-standardized | Schizophrenia | Rate   | 1990 | 22.783 | 26.979 | 19.222 |
| Incidence | China    | Male | Age-standardized | Schizophrenia | Rate   | 1991 | 22.810 | 26.980 | 19.255 |
| Incidence | China    | Male | Age-standardized | Schizophrenia | Rate   | 1992 | 22.833 | 26.987 | 19.284 |
| Incidence | China    | Male | Age-standardized | Schizophrenia | Rate   | 1993 | 22.853 | 27.008 | 19.310 |
| Incidence | China    | Male | Age-standardized | Schizophrenia | Rate   | 1994 | 22.870 | 27.019 | 19.328 |
| Incidence | China    | Male | Age-standardized | Schizophrenia | Rate   | 1995 | 22.883 | 27.023 | 19.344 |
| Incidence | China    | Male | Age-standardized | Schizophrenia | Rate   | 1996 | 22.883 | 26.963 | 19.339 |
| Incidence | China    | Male | Age-standardized | Schizophrenia | Rate   | 1997 | 22.872 | 26.929 | 19.325 |
| Incidence | China    | Male | Age-standardized | Schizophrenia | Rate   | 1998 | 22.860 | 26.922 | 19.310 |
| Incidence | China    | Male | Age-standardized | Schizophrenia | Rate   | 1999 | 22.852 | 26.917 | 19.291 |
| Incidence | China    | Male | Age-standardized | Schizophrenia | Rate   | 2000 | 22.855 | 26.921 | 19.265 |
| Incidence | China    | Male | Age-standardized | Schizophrenia | Rate   | 2001 | 22.866 | 26.930 | 19.292 |
| Incidence | China    | Male | Age-standardized | Schizophrenia | Rate   | 2002 | 22.884 | 26.948 | 19.317 |
| Incidence | China    | Male | Age-standardized | Schizophrenia | Rate   | 2003 | 22.904 | 26.971 | 19.347 |
| Incidence | China    | Male | Age-standardized | Schizophrenia | Rate   | 2004 | 22.922 | 26.988 | 19.371 |
| Incidence | China    | Male | Age-standardized | Schizophrenia | Rate   | 2005 | 22.929 | 27.009 | 19.384 |

|           |       |        |                  |               |        |      |        |        |        |
|-----------|-------|--------|------------------|---------------|--------|------|--------|--------|--------|
| Incidence | China | Male   | Age-standardized | Schizophrenia | Rate   | 2006 | 22.928 | 27.042 | 19.352 |
| Incidence | China | Male   | Age-standardized | Schizophrenia | Rate   | 2007 | 22.925 | 27.069 | 19.353 |
| Incidence | China | Male   | Age-standardized | Schizophrenia | Rate   | 2008 | 22.922 | 27.049 | 19.351 |
| Incidence | China | Male   | Age-standardized | Schizophrenia | Rate   | 2009 | 22.918 | 26.994 | 19.352 |
| Incidence | China | Male   | Age-standardized | Schizophrenia | Rate   | 2010 | 22.913 | 26.940 | 19.356 |
| Incidence | China | Male   | Age-standardized | Schizophrenia | Rate   | 2011 | 22.900 | 26.967 | 19.321 |
| Incidence | China | Male   | Age-standardized | Schizophrenia | Rate   | 2012 | 22.876 | 27.002 | 19.280 |
| Incidence | China | Male   | Age-standardized | Schizophrenia | Rate   | 2013 | 22.850 | 27.037 | 19.237 |
| Incidence | China | Male   | Age-standardized | Schizophrenia | Rate   | 2014 | 22.832 | 27.005 | 19.199 |
| Incidence | China | Male   | Age-standardized | Schizophrenia | Rate   | 2015 | 22.827 | 27.024 | 19.175 |
| Incidence | China | Male   | Age-standardized | Schizophrenia | Rate   | 2016 | 22.834 | 27.047 | 19.178 |
| Incidence | China | Male   | Age-standardized | Schizophrenia | Rate   | 2017 | 22.841 | 27.079 | 19.181 |
| Incidence | China | Male   | Age-standardized | Schizophrenia | Rate   | 2018 | 22.848 | 27.119 | 19.182 |
| Incidence | China | Male   | Age-standardized | Schizophrenia | Rate   | 2019 | 22.855 | 27.152 | 19.204 |
| Incidence | China | Male   | Age-standardized | Schizophrenia | Rate   | 2020 | 22.862 | 27.174 | 19.246 |
| Incidence | China | Male   | Age-standardized | Schizophrenia | Rate   | 2021 | 22.845 | 27.191 | 19.263 |
| Incidence | China | Male   | Age-standardized | Schizophrenia | Rate   | 2022 | 22.822 | 27.074 | 19.261 |
| Incidence | China | Male   | Age-standardized | Schizophrenia | Rate   | 2023 | 22.774 | 26.927 | 19.210 |
| Incidence | China | Female | All ages         | Schizophrenia | Number | 1990 | 115697 | 138931 | 97975  |
| Incidence | China | Female | All ages         | Schizophrenia | Number | 1991 | 117233 | 141562 | 98669  |
| Incidence | China | Female | All ages         | Schizophrenia | Number | 1992 | 118389 | 142782 | 99255  |
| Incidence | China | Female | All ages         | Schizophrenia | Number | 1993 | 119326 | 144026 | 99991  |
| Incidence | China | Female | All ages         | Schizophrenia | Number | 1994 | 120150 | 144863 | 100897 |
| Incidence | China | Female | All ages         | Schizophrenia | Number | 1995 | 120846 | 145075 | 101656 |
| Incidence | China | Female | All ages         | Schizophrenia | Number | 1996 | 121423 | 144744 | 101964 |
| Incidence | China | Female | All ages         | Schizophrenia | Number | 1997 | 121971 | 145105 | 102294 |
| Incidence | China | Female | All ages         | Schizophrenia | Number | 1998 | 122654 | 145563 | 102845 |
| Incidence | China | Female | All ages         | Schizophrenia | Number | 1999 | 123608 | 146409 | 103643 |
| Incidence | China | Female | All ages         | Schizophrenia | Number | 2000 | 124815 | 147664 | 104782 |
| Incidence | China | Female | All ages         | Schizophrenia | Number | 2001 | 126232 | 148978 | 106304 |
| Incidence | China | Female | All ages         | Schizophrenia | Number | 2002 | 127783 | 150875 | 107664 |
| Incidence | China | Female | All ages         | Schizophrenia | Number | 2003 | 129485 | 153054 | 109172 |
| Incidence | China | Female | All ages         | Schizophrenia | Number | 2004 | 131350 | 155430 | 110945 |
| Incidence | China | Female | All ages         | Schizophrenia | Number | 2005 | 133273 | 157923 | 112845 |
| Incidence | China | Female | All ages         | Schizophrenia | Number | 2006 | 135140 | 160007 | 114629 |
| Incidence | China | Female | All ages         | Schizophrenia | Number | 2007 | 136867 | 161791 | 116337 |
| Incidence | China | Female | All ages         | Schizophrenia | Number | 2008 | 138411 | 163336 | 117378 |
| Incidence | China | Female | All ages         | Schizophrenia | Number | 2009 | 139662 | 164622 | 117924 |
| Incidence | China | Female | All ages         | Schizophrenia | Number | 2010 | 140601 | 165575 | 118446 |
| Incidence | China | Female | All ages         | Schizophrenia | Number | 2011 | 141055 | 165557 | 118846 |
| Incidence | China | Female | All ages         | Schizophrenia | Number | 2012 | 141031 | 166301 | 118801 |
| Incidence | China | Female | All ages         | Schizophrenia | Number | 2013 | 140618 | 165325 | 118824 |
| Incidence | China | Female | All ages         | Schizophrenia | Number | 2014 | 139823 | 164824 | 117641 |
| Incidence | China | Female | All ages         | Schizophrenia | Number | 2015 | 138940 | 164109 | 116370 |
| Incidence | China | Female | All ages         | Schizophrenia | Number | 2016 | 138026 | 163092 | 115831 |
| Incidence | China | Female | All ages         | Schizophrenia | Number | 2017 | 137149 | 161803 | 115135 |
| Incidence | China | Female | All ages         | Schizophrenia | Number | 2018 | 136314 | 161028 | 114760 |
| Incidence | China | Female | All ages         | Schizophrenia | Number | 2019 | 135413 | 159400 | 114169 |
| Incidence | China | Female | All ages         | Schizophrenia | Number | 2020 | 134565 | 157905 | 113505 |
| Incidence | China | Female | All ages         | Schizophrenia | Number | 2021 | 133622 | 156211 | 112939 |
| Incidence | China | Female | All ages         | Schizophrenia | Number | 2022 | 132841 | 154498 | 112049 |
| Incidence | China | Female | All ages         | Schizophrenia | Number | 2023 | 132520 | 155089 | 111395 |
| Incidence | China | Female | Age-standardized | Schizophrenia | Rate   | 1990 | 18.345 | 21.779 | 15.447 |
| Incidence | China | Female | Age-standardized | Schizophrenia | Rate   | 1991 | 18.367 | 21.754 | 15.459 |

|            |       |        |                  |               |        |      |         |         |         |
|------------|-------|--------|------------------|---------------|--------|------|---------|---------|---------|
| Incidence  | China | Female | Age-standardized | Schizophrenia | Rate   | 1992 | 18.386  | 21.732  | 15.470  |
| Incidence  | China | Female | Age-standardized | Schizophrenia | Rate   | 1993 | 18.405  | 21.721  | 15.481  |
| Incidence  | China | Female | Age-standardized | Schizophrenia | Rate   | 1994 | 18.423  | 21.711  | 15.515  |
| Incidence  | China | Female | Age-standardized | Schizophrenia | Rate   | 1995 | 18.435  | 21.698  | 15.552  |
| Incidence  | China | Female | Age-standardized | Schizophrenia | Rate   | 1996 | 18.442  | 21.723  | 15.527  |
| Incidence  | China | Female | Age-standardized | Schizophrenia | Rate   | 1997 | 18.447  | 21.762  | 15.492  |
| Incidence  | China | Female | Age-standardized | Schizophrenia | Rate   | 1998 | 18.453  | 21.822  | 15.504  |
| Incidence  | China | Female | Age-standardized | Schizophrenia | Rate   | 1999 | 18.461  | 21.891  | 15.517  |
| Incidence  | China | Female | Age-standardized | Schizophrenia | Rate   | 2000 | 18.470  | 21.930  | 15.526  |
| Incidence  | China | Female | Age-standardized | Schizophrenia | Rate   | 2001 | 18.479  | 21.944  | 15.553  |
| Incidence  | China | Female | Age-standardized | Schizophrenia | Rate   | 2002 | 18.486  | 21.923  | 15.577  |
| Incidence  | China | Female | Age-standardized | Schizophrenia | Rate   | 2003 | 18.494  | 21.902  | 15.601  |
| Incidence  | China | Female | Age-standardized | Schizophrenia | Rate   | 2004 | 18.499  | 21.884  | 15.622  |
| Incidence  | China | Female | Age-standardized | Schizophrenia | Rate   | 2005 | 18.500  | 21.841  | 15.643  |
| Incidence  | China | Female | Age-standardized | Schizophrenia | Rate   | 2006 | 18.494  | 21.848  | 15.615  |
| Incidence  | China | Female | Age-standardized | Schizophrenia | Rate   | 2007 | 18.485  | 21.856  | 15.587  |
| Incidence  | China | Female | Age-standardized | Schizophrenia | Rate   | 2008 | 18.476  | 21.867  | 15.559  |
| Incidence  | China | Female | Age-standardized | Schizophrenia | Rate   | 2009 | 18.467  | 21.873  | 15.532  |
| Incidence  | China | Female | Age-standardized | Schizophrenia | Rate   | 2010 | 18.459  | 21.888  | 15.504  |
| Incidence  | China | Female | Age-standardized | Schizophrenia | Rate   | 2011 | 18.447  | 21.858  | 15.479  |
| Incidence  | China | Female | Age-standardized | Schizophrenia | Rate   | 2012 | 18.428  | 21.830  | 15.466  |
| Incidence  | China | Female | Age-standardized | Schizophrenia | Rate   | 2013 | 18.408  | 21.785  | 15.450  |
| Incidence  | China | Female | Age-standardized | Schizophrenia | Rate   | 2014 | 18.392  | 21.728  | 15.437  |
| Incidence  | China | Female | Age-standardized | Schizophrenia | Rate   | 2015 | 18.388  | 21.684  | 15.424  |
| Incidence  | China | Female | Age-standardized | Schizophrenia | Rate   | 2016 | 18.396  | 21.753  | 15.444  |
| Incidence  | China | Female | Age-standardized | Schizophrenia | Rate   | 2017 | 18.410  | 21.785  | 15.458  |
| Incidence  | China | Female | Age-standardized | Schizophrenia | Rate   | 2018 | 18.425  | 21.785  | 15.469  |
| Incidence  | China | Female | Age-standardized | Schizophrenia | Rate   | 2019 | 18.437  | 21.783  | 15.476  |
| Incidence  | China | Female | Age-standardized | Schizophrenia | Rate   | 2020 | 18.444  | 21.793  | 15.480  |
| Incidence  | China | Female | Age-standardized | Schizophrenia | Rate   | 2021 | 18.438  | 21.800  | 15.481  |
| Incidence  | China | Female | Age-standardized | Schizophrenia | Rate   | 2022 | 18.430  | 21.775  | 15.503  |
| Incidence  | China | Female | Age-standardized | Schizophrenia | Rate   | 2023 | 18.422  | 21.884  | 15.403  |
| Prevalence | China | Male   | All ages         | Schizophrenia | Number | 1990 | 1926496 | 2282654 | 1592841 |
| Prevalence | China | Male   | All ages         | Schizophrenia | Number | 1991 | 1981431 | 2344891 | 1635878 |
| Prevalence | China | Male   | All ages         | Schizophrenia | Number | 1992 | 2032456 | 2403087 | 1679751 |
| Prevalence | China | Male   | All ages         | Schizophrenia | Number | 1993 | 2079638 | 2457764 | 1724860 |
| Prevalence | China | Male   | All ages         | Schizophrenia | Number | 1994 | 2122334 | 2509672 | 1766827 |
| Prevalence | China | Male   | All ages         | Schizophrenia | Number | 1995 | 2160332 | 2557229 | 1803643 |
| Prevalence | China | Male   | All ages         | Schizophrenia | Number | 1996 | 2193614 | 2600734 | 1831544 |
| Prevalence | China | Male   | All ages         | Schizophrenia | Number | 1997 | 2223505 | 2640083 | 1856484 |
| Prevalence | China | Male   | All ages         | Schizophrenia | Number | 1998 | 2252272 | 2678007 | 1878839 |
| Prevalence | China | Male   | All ages         | Schizophrenia | Number | 1999 | 2281190 | 2717342 | 1903264 |
| Prevalence | China | Male   | All ages         | Schizophrenia | Number | 2000 | 2311361 | 2751228 | 1928777 |
| Prevalence | China | Male   | All ages         | Schizophrenia | Number | 2001 | 2343398 | 2788550 | 1962076 |
| Prevalence | China | Male   | All ages         | Schizophrenia | Number | 2002 | 2376994 | 2828723 | 1985401 |
| Prevalence | China | Male   | All ages         | Schizophrenia | Number | 2003 | 2412723 | 2872481 | 2011163 |
| Prevalence | China | Male   | All ages         | Schizophrenia | Number | 2004 | 2450228 | 2918740 | 2046763 |
| Prevalence | China | Male   | All ages         | Schizophrenia | Number | 2005 | 2488669 | 2966975 | 2082678 |
| Prevalence | China | Male   | All ages         | Schizophrenia | Number | 2006 | 2527488 | 3006837 | 2117717 |
| Prevalence | China | Male   | All ages         | Schizophrenia | Number | 2007 | 2566872 | 3042175 | 2152233 |
| Prevalence | China | Male   | All ages         | Schizophrenia | Number | 2008 | 2606975 | 3084348 | 2186837 |
| Prevalence | China | Male   | All ages         | Schizophrenia | Number | 2009 | 2646937 | 3126886 | 2221848 |
| Prevalence | China | Male   | All ages         | Schizophrenia | Number | 2010 | 2685318 | 3168804 | 2255110 |
| Prevalence | China | Male   | All ages         | Schizophrenia | Number | 2011 | 2720337 | 3210510 | 2283505 |

|            |       |        |                  |               |        |      |         |         |         |
|------------|-------|--------|------------------|---------------|--------|------|---------|---------|---------|
| Prevalence | China | Male   | All ages         | Schizophrenia | Number | 2012 | 2752687 | 3251321 | 2309583 |
| Prevalence | China | Male   | All ages         | Schizophrenia | Number | 2013 | 2783095 | 3287351 | 2332884 |
| Prevalence | China | Male   | All ages         | Schizophrenia | Number | 2014 | 2810752 | 3312978 | 2351190 |
| Prevalence | China | Male   | All ages         | Schizophrenia | Number | 2015 | 2835894 | 3338331 | 2366154 |
| Prevalence | China | Male   | All ages         | Schizophrenia | Number | 2016 | 2856528 | 3358483 | 2378655 |
| Prevalence | China | Male   | All ages         | Schizophrenia | Number | 2017 | 2873329 | 3380032 | 2388218 |
| Prevalence | China | Male   | All ages         | Schizophrenia | Number | 2018 | 2888065 | 3403633 | 2399734 |
| Prevalence | China | Male   | All ages         | Schizophrenia | Number | 2019 | 2900956 | 3429527 | 2413092 |
| Prevalence | China | Male   | All ages         | Schizophrenia | Number | 2020 | 2913669 | 3444651 | 2426639 |
| Prevalence | China | Male   | All ages         | Schizophrenia | Number | 2021 | 2921516 | 3443953 | 2432274 |
| Prevalence | China | Male   | All ages         | Schizophrenia | Number | 2022 | 2925836 | 3443044 | 2435781 |
| Prevalence | China | Male   | All ages         | Schizophrenia | Number | 2023 | 2925661 | 3441426 | 2451025 |
| Prevalence | China | Male   | Age-standardized | Schizophrenia | Rate   | 1990 | 322.433 | 380.645 | 269.453 |
| Prevalence | China | Male   | Age-standardized | Schizophrenia | Rate   | 1991 | 322.904 | 380.811 | 270.501 |
| Prevalence | China | Male   | Age-standardized | Schizophrenia | Rate   | 1992 | 323.303 | 381.536 | 270.770 |
| Prevalence | China | Male   | Age-standardized | Schizophrenia | Rate   | 1993 | 323.627 | 382.452 | 270.935 |
| Prevalence | China | Male   | Age-standardized | Schizophrenia | Rate   | 1994 | 323.877 | 383.261 | 271.443 |
| Prevalence | China | Male   | Age-standardized | Schizophrenia | Rate   | 1995 | 324.045 | 383.920 | 272.012 |
| Prevalence | China | Male   | Age-standardized | Schizophrenia | Rate   | 1996 | 324.048 | 383.431 | 271.831 |
| Prevalence | China | Male   | Age-standardized | Schizophrenia | Rate   | 1997 | 323.873 | 382.832 | 272.005 |
| Prevalence | China | Male   | Age-standardized | Schizophrenia | Rate   | 1998 | 323.639 | 382.663 | 272.370 |
| Prevalence | China | Male   | Age-standardized | Schizophrenia | Rate   | 1999 | 323.447 | 382.586 | 272.745 |
| Prevalence | China | Male   | Age-standardized | Schizophrenia | Rate   | 2000 | 323.395 | 382.342 | 272.976 |
| Prevalence | China | Male   | Age-standardized | Schizophrenia | Rate   | 2001 | 323.484 | 382.892 | 272.459 |
| Prevalence | China | Male   | Age-standardized | Schizophrenia | Rate   | 2002 | 323.641 | 382.999 | 271.681 |
| Prevalence | China | Male   | Age-standardized | Schizophrenia | Rate   | 2003 | 323.839 | 383.382 | 270.943 |
| Prevalence | China | Male   | Age-standardized | Schizophrenia | Rate   | 2004 | 324.027 | 383.699 | 270.535 |
| Prevalence | China | Male   | Age-standardized | Schizophrenia | Rate   | 2005 | 324.153 | 383.824 | 270.449 |
| Prevalence | China | Male   | Age-standardized | Schizophrenia | Rate   | 2006 | 324.276 | 383.504 | 270.728 |
| Prevalence | China | Male   | Age-standardized | Schizophrenia | Rate   | 2007 | 324.474 | 383.040 | 271.418 |
| Prevalence | China | Male   | Age-standardized | Schizophrenia | Rate   | 2008 | 324.714 | 382.677 | 272.481 |
| Prevalence | China | Male   | Age-standardized | Schizophrenia | Rate   | 2009 | 324.937 | 382.383 | 272.900 |
| Prevalence | China | Male   | Age-standardized | Schizophrenia | Rate   | 2010 | 325.084 | 382.251 | 272.918 |
| Prevalence | China | Male   | Age-standardized | Schizophrenia | Rate   | 2011 | 325.189 | 382.583 | 272.734 |
| Prevalence | China | Male   | Age-standardized | Schizophrenia | Rate   | 2012 | 325.324 | 382.987 | 272.515 |
| Prevalence | China | Male   | Age-standardized | Schizophrenia | Rate   | 2013 | 325.476 | 383.428 | 272.284 |
| Prevalence | China | Male   | Age-standardized | Schizophrenia | Rate   | 2014 | 325.617 | 383.960 | 272.215 |
| Prevalence | China | Male   | Age-standardized | Schizophrenia | Rate   | 2015 | 325.714 | 384.524 | 272.062 |
| Prevalence | China | Male   | Age-standardized | Schizophrenia | Rate   | 2016 | 325.752 | 384.931 | 271.968 |
| Prevalence | China | Male   | Age-standardized | Schizophrenia | Rate   | 2017 | 325.746 | 385.694 | 272.008 |
| Prevalence | China | Male   | Age-standardized | Schizophrenia | Rate   | 2018 | 325.718 | 385.742 | 271.891 |
| Prevalence | China | Male   | Age-standardized | Schizophrenia | Rate   | 2019 | 325.685 | 385.593 | 271.921 |
| Prevalence | China | Male   | Age-standardized | Schizophrenia | Rate   | 2020 | 325.664 | 385.403 | 271.931 |
| Prevalence | China | Male   | Age-standardized | Schizophrenia | Rate   | 2021 | 325.465 | 385.099 | 271.993 |
| Prevalence | China | Male   | Age-standardized | Schizophrenia | Rate   | 2022 | 325.196 | 383.589 | 272.202 |
| Prevalence | China | Male   | Age-standardized | Schizophrenia | Rate   | 2023 | 324.399 | 383.474 | 272.297 |
| Prevalence | China | Female | All ages         | Schizophrenia | Number | 1990 | 1544462 | 1844258 | 1278400 |
| Prevalence | China | Female | All ages         | Schizophrenia | Number | 1991 | 1584088 | 1888904 | 1312980 |
| Prevalence | China | Female | All ages         | Schizophrenia | Number | 1992 | 1621608 | 1931045 | 1346171 |
| Prevalence | China | Female | All ages         | Schizophrenia | Number | 1993 | 1657552 | 1971706 | 1377249 |
| Prevalence | China | Female | All ages         | Schizophrenia | Number | 1994 | 1691855 | 2011717 | 1407396 |
| Prevalence | China | Female | All ages         | Schizophrenia | Number | 1995 | 1724187 | 2054639 | 1435704 |
| Prevalence | China | Female | All ages         | Schizophrenia | Number | 1996 | 1755578 | 2090121 | 1464790 |
| Prevalence | China | Female | All ages         | Schizophrenia | Number | 1997 | 1787129 | 2127537 | 1489492 |

|            |       |        |                  |               |        |      |         |         |         |
|------------|-------|--------|------------------|---------------|--------|------|---------|---------|---------|
| Prevalence | China | Female | All ages         | Schizophrenia | Number | 1998 | 1819285 | 2168670 | 1514736 |
| Prevalence | China | Female | All ages         | Schizophrenia | Number | 1999 | 1851727 | 2210434 | 1540905 |
| Prevalence | China | Female | All ages         | Schizophrenia | Number | 2000 | 1883670 | 2252248 | 1569190 |
| Prevalence | China | Female | All ages         | Schizophrenia | Number | 2001 | 1915012 | 2286817 | 1597667 |
| Prevalence | China | Female | All ages         | Schizophrenia | Number | 2002 | 1946703 | 2326745 | 1628921 |
| Prevalence | China | Female | All ages         | Schizophrenia | Number | 2003 | 1980028 | 2363777 | 1661919 |
| Prevalence | China | Female | All ages         | Schizophrenia | Number | 2004 | 2015340 | 2403762 | 1696076 |
| Prevalence | China | Female | All ages         | Schizophrenia | Number | 2005 | 2052255 | 2448257 | 1729556 |
| Prevalence | China | Female | All ages         | Schizophrenia | Number | 2006 | 2090078 | 2488381 | 1761773 |
| Prevalence | China | Female | All ages         | Schizophrenia | Number | 2007 | 2128448 | 2526818 | 1794586 |
| Prevalence | China | Female | All ages         | Schizophrenia | Number | 2008 | 2167379 | 2566823 | 1826954 |
| Prevalence | China | Female | All ages         | Schizophrenia | Number | 2009 | 2206092 | 2613836 | 1858357 |
| Prevalence | China | Female | All ages         | Schizophrenia | Number | 2010 | 2243288 | 2654616 | 1887599 |
| Prevalence | China | Female | All ages         | Schizophrenia | Number | 2011 | 2277541 | 2691477 | 1913207 |
| Prevalence | China | Female | All ages         | Schizophrenia | Number | 2012 | 2309127 | 2729036 | 1933770 |
| Prevalence | China | Female | All ages         | Schizophrenia | Number | 2013 | 2338397 | 2766870 | 1956206 |
| Prevalence | China | Female | All ages         | Schizophrenia | Number | 2014 | 2364402 | 2798277 | 1977313 |
| Prevalence | China | Female | All ages         | Schizophrenia | Number | 2015 | 2387153 | 2822624 | 1994288 |
| Prevalence | China | Female | All ages         | Schizophrenia | Number | 2016 | 2405527 | 2843796 | 2007812 |
| Prevalence | China | Female | All ages         | Schizophrenia | Number | 2017 | 2420512 | 2859450 | 2018873 |
| Prevalence | China | Female | All ages         | Schizophrenia | Number | 2018 | 2433487 | 2870246 | 2035107 |
| Prevalence | China | Female | All ages         | Schizophrenia | Number | 2019 | 2444346 | 2876252 | 2047032 |
| Prevalence | China | Female | All ages         | Schizophrenia | Number | 2020 | 2454441 | 2885343 | 2061223 |
| Prevalence | China | Female | All ages         | Schizophrenia | Number | 2021 | 2461988 | 2874308 | 2072788 |
| Prevalence | China | Female | All ages         | Schizophrenia | Number | 2022 | 2467358 | 2873630 | 2076834 |
| Prevalence | China | Female | All ages         | Schizophrenia | Number | 2023 | 2469230 | 2895939 | 2074473 |
| Prevalence | China | Female | Age-standardized | Schizophrenia | Rate   | 1990 | 276.900 | 329.609 | 233.246 |
| Prevalence | China | Female | Age-standardized | Schizophrenia | Rate   | 1991 | 276.949 | 330.097 | 233.467 |
| Prevalence | China | Female | Age-standardized | Schizophrenia | Rate   | 1992 | 277.016 | 329.513 | 233.656 |
| Prevalence | China | Female | Age-standardized | Schizophrenia | Rate   | 1993 | 277.099 | 328.983 | 233.586 |
| Prevalence | China | Female | Age-standardized | Schizophrenia | Rate   | 1994 | 277.193 | 329.148 | 233.404 |
| Prevalence | China | Female | Age-standardized | Schizophrenia | Rate   | 1995 | 277.272 | 329.193 | 233.221 |
| Prevalence | China | Female | Age-standardized | Schizophrenia | Rate   | 1996 | 277.390 | 329.561 | 233.416 |
| Prevalence | China | Female | Age-standardized | Schizophrenia | Rate   | 1997 | 277.583 | 330.148 | 233.422 |
| Prevalence | China | Female | Age-standardized | Schizophrenia | Rate   | 1998 | 277.811 | 330.541 | 233.881 |
| Prevalence | China | Female | Age-standardized | Schizophrenia | Rate   | 1999 | 278.016 | 329.586 | 233.903 |
| Prevalence | China | Female | Age-standardized | Schizophrenia | Rate   | 2000 | 278.129 | 329.633 | 233.740 |
| Prevalence | China | Female | Age-standardized | Schizophrenia | Rate   | 2001 | 278.117 | 329.104 | 234.313 |
| Prevalence | China | Female | Age-standardized | Schizophrenia | Rate   | 2002 | 278.031 | 329.709 | 234.771 |
| Prevalence | China | Female | Age-standardized | Schizophrenia | Rate   | 2003 | 277.936 | 330.772 | 234.836 |
| Prevalence | China | Female | Age-standardized | Schizophrenia | Rate   | 2004 | 277.869 | 331.258 | 234.610 |
| Prevalence | China | Female | Age-standardized | Schizophrenia | Rate   | 2005 | 277.855 | 331.348 | 234.300 |
| Prevalence | China | Female | Age-standardized | Schizophrenia | Rate   | 2006 | 277.931 | 331.456 | 234.350 |
| Prevalence | China | Female | Age-standardized | Schizophrenia | Rate   | 2007 | 278.091 | 330.832 | 234.487 |
| Prevalence | China | Female | Age-standardized | Schizophrenia | Rate   | 2008 | 278.306 | 330.286 | 234.606 |
| Prevalence | China | Female | Age-standardized | Schizophrenia | Rate   | 2009 | 278.519 | 330.036 | 234.629 |
| Prevalence | China | Female | Age-standardized | Schizophrenia | Rate   | 2010 | 278.659 | 330.500 | 234.600 |
| Prevalence | China | Female | Age-standardized | Schizophrenia | Rate   | 2011 | 278.748 | 330.958 | 234.586 |
| Prevalence | China | Female | Age-standardized | Schizophrenia | Rate   | 2012 | 278.848 | 331.170 | 234.558 |
| Prevalence | China | Female | Age-standardized | Schizophrenia | Rate   | 2013 | 278.958 | 331.528 | 234.462 |
| Prevalence | China | Female | Age-standardized | Schizophrenia | Rate   | 2014 | 279.064 | 331.651 | 234.348 |
| Prevalence | China | Female | Age-standardized | Schizophrenia | Rate   | 2015 | 279.138 | 331.711 | 234.358 |
| Prevalence | China | Female | Age-standardized | Schizophrenia | Rate   | 2016 | 279.193 | 331.770 | 234.141 |
| Prevalence | China | Female | Age-standardized | Schizophrenia | Rate   | 2017 | 279.248 | 331.822 | 233.996 |

|            |       |        |                  |               |        |      |         |         |         |
|------------|-------|--------|------------------|---------------|--------|------|---------|---------|---------|
| Prevalence | China | Female | Age-standardized | Schizophrenia | Rate   | 2018 | 279.299 | 331.442 | 233.968 |
| Prevalence | China | Female | Age-standardized | Schizophrenia | Rate   | 2019 | 279.342 | 331.154 | 233.951 |
| Prevalence | China | Female | Age-standardized | Schizophrenia | Rate   | 2020 | 279.366 | 330.972 | 233.902 |
| Prevalence | China | Female | Age-standardized | Schizophrenia | Rate   | 2021 | 279.366 | 331.567 | 233.614 |
| Prevalence | China | Female | Age-standardized | Schizophrenia | Rate   | 2022 | 279.323 | 331.191 | 233.864 |
| Prevalence | China | Female | Age-standardized | Schizophrenia | Rate   | 2023 | 278.859 | 331.617 | 234.445 |
| DALYs      | China | Male   | All ages         | Schizophrenia | Number | 1990 | 1249021 | 1575895 | 905406  |
| DALYs      | China | Male   | All ages         | Schizophrenia | Number | 1991 | 1284845 | 1617795 | 934721  |
| DALYs      | China | Male   | All ages         | Schizophrenia | Number | 1992 | 1319027 | 1666394 | 953760  |
| DALYs      | China | Male   | All ages         | Schizophrenia | Number | 1993 | 1351058 | 1706263 | 982016  |
| DALYs      | China | Male   | All ages         | Schizophrenia | Number | 1994 | 1378508 | 1742087 | 999628  |
| DALYs      | China | Male   | All ages         | Schizophrenia | Number | 1995 | 1404256 | 1769940 | 1020941 |
| DALYs      | China | Male   | All ages         | Schizophrenia | Number | 1996 | 1426208 | 1799075 | 1042535 |
| DALYs      | China | Male   | All ages         | Schizophrenia | Number | 1997 | 1444211 | 1825979 | 1054627 |
| DALYs      | China | Male   | All ages         | Schizophrenia | Number | 1998 | 1460299 | 1830734 | 1064270 |
| DALYs      | China | Male   | All ages         | Schizophrenia | Number | 1999 | 1479103 | 1861033 | 1087232 |
| DALYs      | China | Male   | All ages         | Schizophrenia | Number | 2000 | 1498072 | 1892302 | 1097448 |
| DALYs      | China | Male   | All ages         | Schizophrenia | Number | 2001 | 1518113 | 1903211 | 1106187 |
| DALYs      | China | Male   | All ages         | Schizophrenia | Number | 2002 | 1539684 | 1944740 | 1124166 |
| DALYs      | China | Male   | All ages         | Schizophrenia | Number | 2003 | 1561660 | 1972834 | 1145869 |
| DALYs      | China | Male   | All ages         | Schizophrenia | Number | 2004 | 1586354 | 1993233 | 1163297 |
| DALYs      | China | Male   | All ages         | Schizophrenia | Number | 2005 | 1610300 | 2030410 | 1172921 |
| DALYs      | China | Male   | All ages         | Schizophrenia | Number | 2006 | 1634232 | 2056789 | 1197248 |
| DALYs      | China | Male   | All ages         | Schizophrenia | Number | 2007 | 1657811 | 2079048 | 1219570 |
| DALYs      | China | Male   | All ages         | Schizophrenia | Number | 2008 | 1682943 | 2114272 | 1242657 |
| DALYs      | China | Male   | All ages         | Schizophrenia | Number | 2009 | 1706187 | 2134640 | 1243306 |
| DALYs      | China | Male   | All ages         | Schizophrenia | Number | 2010 | 1728844 | 2175093 | 1270930 |
| DALYs      | China | Male   | All ages         | Schizophrenia | Number | 2011 | 1748356 | 2189358 | 1283506 |
| DALYs      | China | Male   | All ages         | Schizophrenia | Number | 2012 | 1767958 | 2217381 | 1291241 |
| DALYs      | China | Male   | All ages         | Schizophrenia | Number | 2013 | 1785143 | 2230412 | 1293707 |
| DALYs      | China | Male   | All ages         | Schizophrenia | Number | 2014 | 1800241 | 2239205 | 1315207 |
| DALYs      | China | Male   | All ages         | Schizophrenia | Number | 2015 | 1814145 | 2252205 | 1323121 |
| DALYs      | China | Male   | All ages         | Schizophrenia | Number | 2016 | 1827389 | 2291301 | 1333265 |
| DALYs      | China | Male   | All ages         | Schizophrenia | Number | 2017 | 1839092 | 2295495 | 1335243 |
| DALYs      | China | Male   | All ages         | Schizophrenia | Number | 2018 | 1849335 | 2306919 | 1353068 |
| DALYs      | China | Male   | All ages         | Schizophrenia | Number | 2019 | 1858924 | 2316413 | 1366272 |
| DALYs      | China | Male   | All ages         | Schizophrenia | Number | 2020 | 1865959 | 2308336 | 1355430 |
| DALYs      | China | Male   | All ages         | Schizophrenia | Number | 2021 | 1867955 | 2325664 | 1350637 |
| DALYs      | China | Male   | All ages         | Schizophrenia | Number | 2022 | 1868997 | 2336601 | 1356669 |
| DALYs      | China | Male   | All ages         | Schizophrenia | Number | 2023 | 1867497 | 2322508 | 1364871 |
| DALYs      | China | Male   | Age-standardized | Schizophrenia | Rate   | 1990 | 207.250 | 258.337 | 151.971 |
| DALYs      | China | Male   | Age-standardized | Schizophrenia | Rate   | 1991 | 207.617 | 258.480 | 152.305 |
| DALYs      | China | Male   | Age-standardized | Schizophrenia | Rate   | 1992 | 208.105 | 259.234 | 152.880 |
| DALYs      | China | Male   | Age-standardized | Schizophrenia | Rate   | 1993 | 208.543 | 261.080 | 154.529 |
| DALYs      | China | Male   | Age-standardized | Schizophrenia | Rate   | 1994 | 208.728 | 261.376 | 154.705 |
| DALYs      | China | Male   | Age-standardized | Schizophrenia | Rate   | 1995 | 209.064 | 261.916 | 155.687 |
| DALYs      | China | Male   | Age-standardized | Schizophrenia | Rate   | 1996 | 209.157 | 262.594 | 155.199 |
| DALYs      | China | Male   | Age-standardized | Schizophrenia | Rate   | 1997 | 208.886 | 260.811 | 153.543 |
| DALYs      | China | Male   | Age-standardized | Schizophrenia | Rate   | 1998 | 208.491 | 260.272 | 152.891 |
| DALYs      | China | Male   | Age-standardized | Schizophrenia | Rate   | 1999 | 208.446 | 259.564 | 153.989 |
| DALYs      | China | Male   | Age-standardized | Schizophrenia | Rate   | 2000 | 208.443 | 260.833 | 153.969 |
| DALYs      | China | Male   | Age-standardized | Schizophrenia | Rate   | 2001 | 208.514 | 257.967 | 152.825 |
| DALYs      | China | Male   | Age-standardized | Schizophrenia | Rate   | 2002 | 208.709 | 261.573 | 154.641 |
| DALYs      | China | Male   | Age-standardized | Schizophrenia | Rate   | 2003 | 208.782 | 261.732 | 153.907 |

|       |       |        |                  |                      |      |         |         |         |
|-------|-------|--------|------------------|----------------------|------|---------|---------|---------|
| DALYs | China | Male   | Age-standardized | Schizophrenia Rate   | 2004 | 209.058 | 260.403 | 154.633 |
| DALYs | China | Male   | Age-standardized | Schizophrenia Rate   | 2005 | 209.115 | 261.691 | 154.277 |
| DALYs | China | Male   | Age-standardized | Schizophrenia Rate   | 2006 | 209.150 | 262.556 | 154.548 |
| DALYs | China | Male   | Age-standardized | Schizophrenia Rate   | 2007 | 209.159 | 261.827 | 154.590 |
| DALYs | China | Male   | Age-standardized | Schizophrenia Rate   | 2008 | 209.325 | 260.908 | 155.518 |
| DALYs | China | Male   | Age-standardized | Schizophrenia Rate   | 2009 | 209.277 | 262.704 | 154.207 |
| DALYs | China | Male   | Age-standardized | Schizophrenia Rate   | 2010 | 209.222 | 263.856 | 154.874 |
| DALYs | China | Male   | Age-standardized | Schizophrenia Rate   | 2011 | 209.066 | 262.066 | 154.526 |
| DALYs | China | Male   | Age-standardized | Schizophrenia Rate   | 2012 | 209.173 | 261.262 | 154.063 |
| DALYs | China | Male   | Age-standardized | Schizophrenia Rate   | 2013 | 209.148 | 261.241 | 153.036 |
| DALYs | China | Male   | Age-standardized | Schizophrenia Rate   | 2014 | 209.090 | 261.908 | 153.614 |
| DALYs | China | Male   | Age-standardized | Schizophrenia Rate   | 2015 | 209.075 | 261.971 | 154.178 |
| DALYs | China | Male   | Age-standardized | Schizophrenia Rate   | 2016 | 209.263 | 262.779 | 154.469 |
| DALYs | China | Male   | Age-standardized | Schizophrenia Rate   | 2017 | 209.509 | 262.886 | 152.195 |
| DALYs | China | Male   | Age-standardized | Schizophrenia Rate   | 2018 | 209.755 | 262.248 | 153.803 |
| DALYs | China | Male   | Age-standardized | Schizophrenia Rate   | 2019 | 210.040 | 262.172 | 156.448 |
| DALYs | China | Male   | Age-standardized | Schizophrenia Rate   | 2020 | 210.079 | 261.181 | 154.479 |
| DALYs | China | Male   | Age-standardized | Schizophrenia Rate   | 2021 | 209.799 | 261.591 | 154.602 |
| DALYs | China | Male   | Age-standardized | Schizophrenia Rate   | 2022 | 209.635 | 262.208 | 153.863 |
| DALYs | China | Male   | Age-standardized | Schizophrenia Rate   | 2023 | 209.141 | 260.567 | 154.265 |
| DALYs | China | Female | All ages         | Schizophrenia Number | 1990 | 985172  | 1242487 | 724062  |
| DALYs | China | Female | All ages         | Schizophrenia Number | 1991 | 1011436 | 1266525 | 742654  |
| DALYs | China | Female | All ages         | Schizophrenia Number | 1992 | 1036332 | 1303220 | 759393  |
| DALYs | China | Female | All ages         | Schizophrenia Number | 1993 | 1059790 | 1340648 | 772268  |
| DALYs | China | Female | All ages         | Schizophrenia Number | 1994 | 1083147 | 1366321 | 795245  |
| DALYs | China | Female | All ages         | Schizophrenia Number | 1995 | 1103897 | 1402373 | 800480  |
| DALYs | China | Female | All ages         | Schizophrenia Number | 1996 | 1123220 | 1421372 | 816430  |
| DALYs | China | Female | All ages         | Schizophrenia Number | 1997 | 1144375 | 1454376 | 835500  |
| DALYs | China | Female | All ages         | Schizophrenia Number | 1998 | 1164481 | 1467862 | 855110  |
| DALYs | China | Female | All ages         | Schizophrenia Number | 1999 | 1185195 | 1495236 | 873460  |
| DALYs | China | Female | All ages         | Schizophrenia Number | 2000 | 1204476 | 1518268 | 881689  |
| DALYs | China | Female | All ages         | Schizophrenia Number | 2001 | 1225401 | 1536385 | 902711  |
| DALYs | China | Female | All ages         | Schizophrenia Number | 2002 | 1244409 | 1555722 | 915906  |
| DALYs | China | Female | All ages         | Schizophrenia Number | 2003 | 1266129 | 1593142 | 938009  |
| DALYs | China | Female | All ages         | Schizophrenia Number | 2004 | 1287991 | 1622647 | 941627  |
| DALYs | China | Female | All ages         | Schizophrenia Number | 2005 | 1311737 | 1662622 | 961167  |
| DALYs | China | Female | All ages         | Schizophrenia Number | 2006 | 1334165 | 1664196 | 979904  |
| DALYs | China | Female | All ages         | Schizophrenia Number | 2007 | 1358681 | 1707039 | 991473  |
| DALYs | China | Female | All ages         | Schizophrenia Number | 2008 | 1381624 | 1728798 | 1015220 |
| DALYs | China | Female | All ages         | Schizophrenia Number | 2009 | 1406244 | 1770445 | 1028232 |
| DALYs | China | Female | All ages         | Schizophrenia Number | 2010 | 1428678 | 1783802 | 1049882 |
| DALYs | China | Female | All ages         | Schizophrenia Number | 2011 | 1449530 | 1812739 | 1062135 |
| DALYs | China | Female | All ages         | Schizophrenia Number | 2012 | 1468213 | 1838296 | 1069412 |
| DALYs | China | Female | All ages         | Schizophrenia Number | 2013 | 1483927 | 1865314 | 1084089 |
| DALYs | China | Female | All ages         | Schizophrenia Number | 2014 | 1498667 | 1875267 | 1095700 |
| DALYs | China | Female | All ages         | Schizophrenia Number | 2015 | 1512083 | 1892432 | 1090710 |
| DALYs | China | Female | All ages         | Schizophrenia Number | 2016 | 1522853 | 1895786 | 1106493 |
| DALYs | China | Female | All ages         | Schizophrenia Number | 2017 | 1531508 | 1928661 | 1110470 |
| DALYs | China | Female | All ages         | Schizophrenia Number | 2018 | 1540562 | 1912368 | 1120086 |
| DALYs | China | Female | All ages         | Schizophrenia Number | 2019 | 1545929 | 1938446 | 1133607 |
| DALYs | China | Female | All ages         | Schizophrenia Number | 2020 | 1549849 | 1944726 | 1126012 |
| DALYs | China | Female | All ages         | Schizophrenia Number | 2021 | 1553296 | 1943000 | 1131829 |
| DALYs | China | Female | All ages         | Schizophrenia Number | 2022 | 1554954 | 1941132 | 1126203 |
| DALYs | China | Female | All ages         | Schizophrenia Number | 2023 | 1551859 | 1948123 | 1120102 |

|       |       |        |                  |               |      |      |         |         |         |
|-------|-------|--------|------------------|---------------|------|------|---------|---------|---------|
| DALYs | China | Female | Age-standardized | Schizophrenia | Rate | 1990 | 175.273 | 219.911 | 131.541 |
| DALYs | China | Female | Age-standardized | Schizophrenia | Rate | 1991 | 175.505 | 219.741 | 131.137 |
| DALYs | China | Female | Age-standardized | Schizophrenia | Rate | 1992 | 175.739 | 219.510 | 129.741 |
| DALYs | China | Female | Age-standardized | Schizophrenia | Rate | 1993 | 175.917 | 220.551 | 130.045 |
| DALYs | China | Female | Age-standardized | Schizophrenia | Rate | 1994 | 176.276 | 220.383 | 130.581 |
| DALYs | China | Female | Age-standardized | Schizophrenia | Rate | 1995 | 176.388 | 221.333 | 129.515 |
| DALYs | China | Female | Age-standardized | Schizophrenia | Rate | 1996 | 176.404 | 219.990 | 130.098 |
| DALYs | China | Female | Age-standardized | Schizophrenia | Rate | 1997 | 176.734 | 222.220 | 131.174 |
| DALYs | China | Female | Age-standardized | Schizophrenia | Rate | 1998 | 176.851 | 220.852 | 131.833 |
| DALYs | China | Female | Age-standardized | Schizophrenia | Rate | 1999 | 177.050 | 220.983 | 131.372 |
| DALYs | China | Female | Age-standardized | Schizophrenia | Rate | 2000 | 177.015 | 221.780 | 131.623 |
| DALYs | China | Female | Age-standardized | Schizophrenia | Rate | 2001 | 177.212 | 220.875 | 132.287 |
| DALYs | China | Female | Age-standardized | Schizophrenia | Rate | 2002 | 177.081 | 220.755 | 132.189 |
| DALYs | China | Female | Age-standardized | Schizophrenia | Rate | 2003 | 177.135 | 222.124 | 132.398 |
| DALYs | China | Female | Age-standardized | Schizophrenia | Rate | 2004 | 177.087 | 222.733 | 130.564 |
| DALYs | China | Female | Age-standardized | Schizophrenia | Rate | 2005 | 177.190 | 223.432 | 131.394 |
| DALYs | China | Female | Age-standardized | Schizophrenia | Rate | 2006 | 177.084 | 219.426 | 131.414 |
| DALYs | China | Female | Age-standardized | Schizophrenia | Rate | 2007 | 177.269 | 222.337 | 130.937 |
| DALYs | China | Female | Age-standardized | Schizophrenia | Rate | 2008 | 177.265 | 222.069 | 131.587 |
| DALYs | China | Female | Age-standardized | Schizophrenia | Rate | 2009 | 177.517 | 223.820 | 131.008 |
| DALYs | China | Female | Age-standardized | Schizophrenia | Rate | 2010 | 177.537 | 222.338 | 131.233 |
| DALYs | China | Female | Age-standardized | Schizophrenia | Rate | 2011 | 177.625 | 221.785 | 131.614 |
| DALYs | China | Female | Age-standardized | Schizophrenia | Rate | 2012 | 177.641 | 223.951 | 130.026 |
| DALYs | China | Female | Age-standardized | Schizophrenia | Rate | 2013 | 177.527 | 223.381 | 130.593 |
| DALYs | China | Female | Age-standardized | Schizophrenia | Rate | 2014 | 177.542 | 223.327 | 130.954 |
| DALYs | China | Female | Age-standardized | Schizophrenia | Rate | 2015 | 177.641 | 224.650 | 130.312 |
| DALYs | China | Female | Age-standardized | Schizophrenia | Rate | 2016 | 177.717 | 224.417 | 131.422 |
| DALYs | China | Female | Age-standardized | Schizophrenia | Rate | 2017 | 177.827 | 225.083 | 131.337 |
| DALYs | China | Female | Age-standardized | Schizophrenia | Rate | 2018 | 178.127 | 224.422 | 131.863 |
| DALYs | China | Female | Age-standardized | Schizophrenia | Rate | 2019 | 178.202 | 225.101 | 131.560 |
| DALYs | China | Female | Age-standardized | Schizophrenia | Rate | 2020 | 178.103 | 224.400 | 130.786 |
| DALYs | China | Female | Age-standardized | Schizophrenia | Rate | 2021 | 178.217 | 225.823 | 131.567 |
| DALYs | China | Female | Age-standardized | Schizophrenia | Rate | 2022 | 178.183 | 224.875 | 131.936 |
| DALYs | China | Female | Age-standardized | Schizophrenia | Rate | 2023 | 177.612 | 223.143 | 129.649 |

**Supplementary Table S2. Spearman correlation analysis between sociodemographic index (SDI) and age-standardized rates of schizophrenia in China, 1990–2023**

| measure    | location | sex  | cause         | correlation | p_value |
|------------|----------|------|---------------|-------------|---------|
| Incidence  | China    | Both | Schizophrenia | -0.111      | 0.531   |
| Prevalence | China    | Both | Schizophrenia | 0.936       | 0       |
| DALYs      | China    | Both | Schizophrenia | 0.952       | 0       |

  

| measure    | location | sex  | age              | cause         | metric | year | rate    | SDI   |
|------------|----------|------|------------------|---------------|--------|------|---------|-------|
| Incidence  | China    | Both | Age-standardized | Schizophrenia | Rate   | 1990 | 20.634  | 0.465 |
| Incidence  | China    | Both | Age-standardized | Schizophrenia | Rate   | 1991 | 20.661  | 0.473 |
| Incidence  | China    | Both | Age-standardized | Schizophrenia | Rate   | 1992 | 20.683  | 0.481 |
| Incidence  | China    | Both | Age-standardized | Schizophrenia | Rate   | 1993 | 20.704  | 0.490 |
| Incidence  | China    | Both | Age-standardized | Schizophrenia | Rate   | 1994 | 20.721  | 0.498 |
| Incidence  | China    | Both | Age-standardized | Schizophrenia | Rate   | 1995 | 20.731  | 0.507 |
| Incidence  | China    | Both | Age-standardized | Schizophrenia | Rate   | 1996 | 20.732  | 0.517 |
| Incidence  | China    | Both | Age-standardized | Schizophrenia | Rate   | 1997 | 20.726  | 0.527 |
| Incidence  | China    | Both | Age-standardized | Schizophrenia | Rate   | 1998 | 20.720  | 0.536 |
| Incidence  | China    | Both | Age-standardized | Schizophrenia | Rate   | 1999 | 20.716  | 0.544 |
| Incidence  | China    | Both | Age-standardized | Schizophrenia | Rate   | 2000 | 20.718  | 0.552 |
| Incidence  | China    | Both | Age-standardized | Schizophrenia | Rate   | 2001 | 20.725  | 0.559 |
| Incidence  | China    | Both | Age-standardized | Schizophrenia | Rate   | 2002 | 20.734  | 0.566 |
| Incidence  | China    | Both | Age-standardized | Schizophrenia | Rate   | 2003 | 20.745  | 0.573 |
| Incidence  | China    | Both | Age-standardized | Schizophrenia | Rate   | 2004 | 20.754  | 0.581 |
| Incidence  | China    | Both | Age-standardized | Schizophrenia | Rate   | 2005 | 20.756  | 0.590 |
| Incidence  | China    | Both | Age-standardized | Schizophrenia | Rate   | 2006 | 20.750  | 0.601 |
| Incidence  | China    | Both | Age-standardized | Schizophrenia | Rate   | 2007 | 20.742  | 0.611 |
| Incidence  | China    | Both | Age-standardized | Schizophrenia | Rate   | 2008 | 20.734  | 0.621 |
| Incidence  | China    | Both | Age-standardized | Schizophrenia | Rate   | 2009 | 20.727  | 0.630 |
| Incidence  | China    | Both | Age-standardized | Schizophrenia | Rate   | 2010 | 20.721  | 0.642 |
| Incidence  | China    | Both | Age-standardized | Schizophrenia | Rate   | 2011 | 20.709  | 0.652 |
| Incidence  | China    | Both | Age-standardized | Schizophrenia | Rate   | 2012 | 20.689  | 0.657 |
| Incidence  | China    | Both | Age-standardized | Schizophrenia | Rate   | 2013 | 20.669  | 0.661 |
| Incidence  | China    | Both | Age-standardized | Schizophrenia | Rate   | 2014 | 20.656  | 0.665 |
| Incidence  | China    | Both | Age-standardized | Schizophrenia | Rate   | 2015 | 20.657  | 0.667 |
| Incidence  | China    | Both | Age-standardized | Schizophrenia | Rate   | 2016 | 20.670  | 0.670 |
| Incidence  | China    | Both | Age-standardized | Schizophrenia | Rate   | 2017 | 20.686  | 0.678 |
| Incidence  | China    | Both | Age-standardized | Schizophrenia | Rate   | 2018 | 20.703  | 0.687 |
| Incidence  | China    | Both | Age-standardized | Schizophrenia | Rate   | 2019 | 20.719  | 0.696 |
| Incidence  | China    | Both | Age-standardized | Schizophrenia | Rate   | 2020 | 20.731  | 0.706 |
| Incidence  | China    | Both | Age-standardized | Schizophrenia | Rate   | 2021 | 20.725  | 0.714 |
| Incidence  | China    | Both | Age-standardized | Schizophrenia | Rate   | 2022 | 20.713  | 0.721 |
| Incidence  | China    | Both | Age-standardized | Schizophrenia | Rate   | 2023 | 20.690  | 0.728 |
| Prevalence | China    | Both | Age-standardized | Schizophrenia | Rate   | 1990 | 300.439 | 0.465 |
| Prevalence | China    | Both | Age-standardized | Schizophrenia | Rate   | 1991 | 300.719 | 0.473 |
| Prevalence | China    | Both | Age-standardized | Schizophrenia | Rate   | 1992 | 300.965 | 0.481 |
| Prevalence | China    | Both | Age-standardized | Schizophrenia | Rate   | 1993 | 301.174 | 0.490 |
| Prevalence | China    | Both | Age-standardized | Schizophrenia | Rate   | 1994 | 301.343 | 0.498 |
| Prevalence | China    | Both | Age-standardized | Schizophrenia | Rate   | 1995 | 301.455 | 0.507 |
| Prevalence | China    | Both | Age-standardized | Schizophrenia | Rate   | 1996 | 301.491 | 0.517 |
| Prevalence | China    | Both | Age-standardized | Schizophrenia | Rate   | 1997 | 301.463 | 0.527 |
| Prevalence | China    | Both | Age-standardized | Schizophrenia | Rate   | 1998 | 301.418 | 0.536 |
| Prevalence | China    | Both | Age-standardized | Schizophrenia | Rate   | 1999 | 301.383 | 0.544 |
| Prevalence | China    | Both | Age-standardized | Schizophrenia | Rate   | 2000 | 301.376 | 0.552 |
| Prevalence | China    | Both | Age-standardized | Schizophrenia | Rate   | 2001 | 301.381 | 0.559 |

|            |       |      |                  |                    |      |         |       |
|------------|-------|------|------------------|--------------------|------|---------|-------|
| Prevalence | China | Both | Age-standardized | Schizophrenia Rate | 2002 | 301.386 | 0.566 |
| Prevalence | China | Both | Age-standardized | Schizophrenia Rate | 2003 | 301.408 | 0.573 |
| Prevalence | China | Both | Age-standardized | Schizophrenia Rate | 2004 | 301.440 | 0.581 |
| Prevalence | China | Both | Age-standardized | Schizophrenia Rate | 2005 | 301.468 | 0.590 |
| Prevalence | China | Both | Age-standardized | Schizophrenia Rate | 2006 | 301.541 | 0.601 |
| Prevalence | China | Both | Age-standardized | Schizophrenia Rate | 2007 | 301.697 | 0.611 |
| Prevalence | China | Both | Age-standardized | Schizophrenia Rate | 2008 | 301.903 | 0.621 |
| Prevalence | China | Both | Age-standardized | Schizophrenia Rate | 2009 | 302.103 | 0.630 |
| Prevalence | China | Both | Age-standardized | Schizophrenia Rate | 2010 | 302.231 | 0.642 |
| Prevalence | China | Both | Age-standardized | Schizophrenia Rate | 2011 | 302.315 | 0.652 |
| Prevalence | China | Both | Age-standardized | Schizophrenia Rate | 2012 | 302.426 | 0.657 |
| Prevalence | China | Both | Age-standardized | Schizophrenia Rate | 2013 | 302.560 | 0.661 |
| Prevalence | China | Both | Age-standardized | Schizophrenia Rate | 2014 | 302.698 | 0.665 |
| Prevalence | China | Both | Age-standardized | Schizophrenia Rate | 2015 | 302.809 | 0.667 |
| Prevalence | China | Both | Age-standardized | Schizophrenia Rate | 2016 | 302.887 | 0.670 |
| Prevalence | China | Both | Age-standardized | Schizophrenia Rate | 2017 | 302.951 | 0.678 |
| Prevalence | China | Both | Age-standardized | Schizophrenia Rate | 2018 | 303.008 | 0.687 |
| Prevalence | China | Both | Age-standardized | Schizophrenia Rate | 2019 | 303.065 | 0.696 |
| Prevalence | China | Both | Age-standardized | Schizophrenia Rate | 2020 | 303.122 | 0.706 |
| Prevalence | China | Both | Age-standardized | Schizophrenia Rate | 2021 | 303.073 | 0.714 |
| Prevalence | China | Both | Age-standardized | Schizophrenia Rate | 2022 | 302.967 | 0.721 |
| Prevalence | China | Both | Age-standardized | Schizophrenia Rate | 2023 | 302.386 | 0.728 |
| DALYs      | China | Both | Age-standardized | Schizophrenia Rate | 1990 | 191.800 | 0.465 |
| DALYs      | China | Both | Age-standardized | Schizophrenia Rate | 1991 | 192.112 | 0.473 |
| DALYs      | China | Both | Age-standardized | Schizophrenia Rate | 1992 | 192.477 | 0.481 |
| DALYs      | China | Both | Age-standardized | Schizophrenia Rate | 1993 | 192.796 | 0.490 |
| DALYs      | China | Both | Age-standardized | Schizophrenia Rate | 1994 | 193.059 | 0.498 |
| DALYs      | China | Both | Age-standardized | Schizophrenia Rate | 1995 | 193.278 | 0.507 |
| DALYs      | China | Both | Age-standardized | Schizophrenia Rate | 1996 | 193.317 | 0.517 |
| DALYs      | China | Both | Age-standardized | Schizophrenia Rate | 1997 | 193.316 | 0.527 |
| DALYs      | China | Both | Age-standardized | Schizophrenia Rate | 1998 | 193.145 | 0.536 |
| DALYs      | China | Both | Age-standardized | Schizophrenia Rate | 1999 | 193.194 | 0.544 |
| DALYs      | China | Both | Age-standardized | Schizophrenia Rate | 2000 | 193.152 | 0.552 |
| DALYs      | China | Both | Age-standardized | Schizophrenia Rate | 2001 | 193.259 | 0.559 |
| DALYs      | China | Both | Age-standardized | Schizophrenia Rate | 2002 | 193.271 | 0.566 |
| DALYs      | China | Both | Age-standardized | Schizophrenia Rate | 2003 | 193.313 | 0.573 |
| DALYs      | China | Both | Age-standardized | Schizophrenia Rate | 2004 | 193.407 | 0.581 |
| DALYs      | China | Both | Age-standardized | Schizophrenia Rate | 2005 | 193.468 | 0.590 |
| DALYs      | China | Both | Age-standardized | Schizophrenia Rate | 2006 | 193.414 | 0.601 |
| DALYs      | China | Both | Age-standardized | Schizophrenia Rate | 2007 | 193.494 | 0.611 |
| DALYs      | China | Both | Age-standardized | Schizophrenia Rate | 2008 | 193.561 | 0.621 |
| DALYs      | China | Both | Age-standardized | Schizophrenia Rate | 2009 | 193.647 | 0.630 |
| DALYs      | China | Both | Age-standardized | Schizophrenia Rate | 2010 | 193.620 | 0.642 |
| DALYs      | China | Both | Age-standardized | Schizophrenia Rate | 2011 | 193.577 | 0.652 |
| DALYs      | China | Both | Age-standardized | Schizophrenia Rate | 2012 | 193.634 | 0.657 |
| DALYs      | China | Both | Age-standardized | Schizophrenia Rate | 2013 | 193.567 | 0.661 |
| DALYs      | China | Both | Age-standardized | Schizophrenia Rate | 2014 | 193.555 | 0.665 |
| DALYs      | China | Both | Age-standardized | Schizophrenia Rate | 2015 | 193.614 | 0.667 |
| DALYs      | China | Both | Age-standardized | Schizophrenia Rate | 2016 | 193.769 | 0.670 |
| DALYs      | China | Both | Age-standardized | Schizophrenia Rate | 2017 | 193.975 | 0.678 |
| DALYs      | China | Both | Age-standardized | Schizophrenia Rate | 2018 | 194.281 | 0.687 |
| DALYs      | China | Both | Age-standardized | Schizophrenia Rate | 2019 | 194.499 | 0.696 |
| DALYs      | China | Both | Age-standardized | Schizophrenia Rate | 2020 | 194.512 | 0.706 |
| DALYs      | China | Both | Age-standardized | Schizophrenia Rate | 2021 | 194.459 | 0.714 |
| DALYs      | China | Both | Age-standardized | Schizophrenia Rate | 2022 | 194.395 | 0.721 |
| DALYs      | China | Both | Age-standardized | Schizophrenia Rate | 2023 | 193.900 | 0.728 |

**Supplementary Table S3. Results of generalized additive models (GAM)  
for the non-linear relationship between sociodemographic index (SDI)  
and schizophrenia burden in China**

|             | <b>EDF</b> | <b>P-value</b> | <b>Linearity</b> |
|-------------|------------|----------------|------------------|
| <b>ASIR</b> | 2.910      | <0.001         | Non-linear       |
| <b>ASPR</b> | 1.865      | <0.001         | Non-linear       |
| <b>ASDR</b> | 2.818      | <0.001         | Non-linear       |

**Supplementary Table S4. Decomposition analysis of changes in schizophrenia burden attributable to population growth, population aging, and epidemiological changes in China, 1990–2023**

| <b>measure</b> | <b>location</b> | <b>sex</b> | <b>age</b> | <b>cause</b>  | <b>metric</b> | <b>art_</b> | <b>yeand_</b> | <b>yea</b> | <b>Overall difference</b> |
|----------------|-----------------|------------|------------|---------------|---------------|-------------|---------------|------------|---------------------------|
| Incidence      | China           | Male       | All ages   | Schizophrenia | Number        | 1990        | 2023          |            | 21602.815 (14.121%)       |
| Incidence      | China           | Female     | All ages   | Schizophrenia | Number        | 1990        | 2023          |            | 16822.755 (14.540%)       |
| Incidence      | China           | Both       | All ages   | Schizophrenia | Number        | 1990        | 2023          |            | 38425.570 (14.301%)       |
| Prevalence     | China           | Male       | All ages   | Schizophrenia | Number        | 1990        | 2023          |            | 999165.349 (51.864%)      |
| Prevalence     | China           | Female     | All ages   | Schizophrenia | Number        | 1990        | 2023          |            | 924768.469 (59.876%)      |
| Prevalence     | China           | Both       | All ages   | Schizophrenia | Number        | 1990        | 2023          |            | 1923933.817 (55.429%)     |
| DALYs          | China           | Male       | All ages   | Schizophrenia | Number        | 1990        | 2023          |            | 618476.461 (49.517%)      |
| DALYs          | China           | Female     | All ages   | Schizophrenia | Number        | 1990        | 2023          |            | 566687.178 (57.522%)      |
| DALYs          | China           | Both       | All ages   | Schizophrenia | Number        | 1990        | 2023          |            | 1185163.639 (53.047%)     |

| <b>Aging</b>          | <b>Population</b>     | <b>Epidemiological change</b> |
|-----------------------|-----------------------|-------------------------------|
| -18357.145 (-11.999%) | 40053.175 (26.180%)   | -93.214 (-0.061%)             |
| -15615.561 (-13.497%) | 31731.226 (27.426%)   | 707.090 (0.611%)              |
| -34390.809 (-12.800%) | 71995.743 (26.795%)   | 820.636 (0.305%)              |
| 350642.893 (18.201%)  | 633289.699 (32.873%)  | 15232.757 (0.791%)            |
| 351835.805 (22.780%)  | 555116.532 (35.942%)  | 17816.132 (1.154%)            |
| 700769.003 (20.190%)  | 1191405.326 (34.325%) | 31759.489 (0.915%)            |
| 196965.893 (15.770%)  | 407167.699 (32.599%)  | 14342.870 (1.148%)            |
| 196397.605 (19.935%)  | 351194.522 (35.648%)  | 19095.051 (1.938%)            |
| 392082.530 (17.549%)  | 760480.050 (34.038%)  | 32601.059 (1.459%)            |

**Supplementary Table S5. Predicted age-standardized incidence, prevalence, and DALYs rates of schizophrenia in China using the BAPC model, 2024–2052**

| measure   | location | sex    | age              | cause         | metric | year | pred_val | pred_low | pred_up |
|-----------|----------|--------|------------------|---------------|--------|------|----------|----------|---------|
| Incidence | China    | Male   | Age-standardized | Schizophrenia | Rate   | 2024 | 22.768   | 22.473   | 23.063  |
| Incidence | China    | Male   | Age-standardized | Schizophrenia | Rate   | 2025 | 22.739   | 22.272   | 23.206  |
| Incidence | China    | Male   | Age-standardized | Schizophrenia | Rate   | 2026 | 22.709   | 22.028   | 23.390  |
| Incidence | China    | Male   | Age-standardized | Schizophrenia | Rate   | 2027 | 22.678   | 21.753   | 23.604  |
| Incidence | China    | Male   | Age-standardized | Schizophrenia | Rate   | 2028 | 22.647   | 21.449   | 23.845  |
| Incidence | China    | Male   | Age-standardized | Schizophrenia | Rate   | 2029 | 22.616   | 21.121   | 24.111  |
| Incidence | China    | Male   | Age-standardized | Schizophrenia | Rate   | 2030 | 22.584   | 20.770   | 24.397  |
| Incidence | China    | Male   | Age-standardized | Schizophrenia | Rate   | 2031 | 22.550   | 20.398   | 24.703  |
| Incidence | China    | Male   | Age-standardized | Schizophrenia | Rate   | 2032 | 22.516   | 20.006   | 25.026  |
| Incidence | China    | Male   | Age-standardized | Schizophrenia | Rate   | 2033 | 22.482   | 19.597   | 25.367  |
| Incidence | China    | Male   | Age-standardized | Schizophrenia | Rate   | 2034 | 22.448   | 19.170   | 25.726  |
| Incidence | China    | Male   | Age-standardized | Schizophrenia | Rate   | 2035 | 22.412   | 18.725   | 26.100  |
| Incidence | China    | Male   | Age-standardized | Schizophrenia | Rate   | 2036 | 22.376   | 18.263   | 26.488  |
| Incidence | China    | Male   | Age-standardized | Schizophrenia | Rate   | 2037 | 22.339   | 17.786   | 26.891  |
| Incidence | China    | Male   | Age-standardized | Schizophrenia | Rate   | 2038 | 22.302   | 17.295   | 27.309  |
| Incidence | China    | Male   | Age-standardized | Schizophrenia | Rate   | 2039 | 22.264   | 16.788   | 27.741  |
| Incidence | China    | Male   | Age-standardized | Schizophrenia | Rate   | 2040 | 22.226   | 16.267   | 28.186  |
| Incidence | China    | Male   | Age-standardized | Schizophrenia | Rate   | 2041 | 22.188   | 15.732   | 28.643  |
| Incidence | China    | Male   | Age-standardized | Schizophrenia | Rate   | 2042 | 22.148   | 15.183   | 29.113  |
| Incidence | China    | Male   | Age-standardized | Schizophrenia | Rate   | 2043 | 22.109   | 14.622   | 29.596  |
| Incidence | China    | Male   | Age-standardized | Schizophrenia | Rate   | 2044 | 22.070   | 14.048   | 30.092  |
| Incidence | China    | Male   | Age-standardized | Schizophrenia | Rate   | 2045 | 22.031   | 13.462   | 30.599  |
| Incidence | China    | Male   | Age-standardized | Schizophrenia | Rate   | 2046 | 21.990   | 12.863   | 31.118  |
| Incidence | China    | Male   | Age-standardized | Schizophrenia | Rate   | 2047 | 21.950   | 12.253   | 31.647  |
| Incidence | China    | Male   | Age-standardized | Schizophrenia | Rate   | 2048 | 21.910   | 11.631   | 32.188  |
| Incidence | China    | Male   | Age-standardized | Schizophrenia | Rate   | 2049 | 21.869   | 10.999   | 32.740  |
| Incidence | China    | Male   | Age-standardized | Schizophrenia | Rate   | 2050 | 21.829   | 10.355   | 33.304  |
| Incidence | China    | Male   | Age-standardized | Schizophrenia | Rate   | 2051 | 21.789   | 9.700    | 33.878  |
| Incidence | China    | Male   | Age-standardized | Schizophrenia | Rate   | 2052 | 21.748   | 9.035    | 34.462  |
| Incidence | China    | Female | Age-standardized | Schizophrenia | Rate   | 2024 | 18.414   | 18.163   | 18.665  |
| Incidence | China    | Female | Age-standardized | Schizophrenia | Rate   | 2025 | 18.412   | 18.016   | 18.807  |
| Incidence | China    | Female | Age-standardized | Schizophrenia | Rate   | 2026 | 18.409   | 17.834   | 18.983  |
| Incidence | China    | Female | Age-standardized | Schizophrenia | Rate   | 2027 | 18.405   | 17.625   | 19.185  |
| Incidence | China    | Female | Age-standardized | Schizophrenia | Rate   | 2028 | 18.401   | 17.392   | 19.410  |
| Incidence | China    | Female | Age-standardized | Schizophrenia | Rate   | 2029 | 18.396   | 17.136   | 19.655  |
| Incidence | China    | Female | Age-standardized | Schizophrenia | Rate   | 2030 | 18.391   | 16.862   | 19.919  |
| Incidence | China    | Female | Age-standardized | Schizophrenia | Rate   | 2031 | 18.385   | 16.570   | 20.199  |
| Incidence | China    | Female | Age-standardized | Schizophrenia | Rate   | 2032 | 18.378   | 16.261   | 20.496  |
| Incidence | China    | Female | Age-standardized | Schizophrenia | Rate   | 2033 | 18.372   | 15.936   | 20.807  |
| Incidence | China    | Female | Age-standardized | Schizophrenia | Rate   | 2034 | 18.365   | 15.595   | 21.134  |
| Incidence | China    | Female | Age-standardized | Schizophrenia | Rate   | 2035 | 18.357   | 15.239   | 21.474  |
| Incidence | China    | Female | Age-standardized | Schizophrenia | Rate   | 2036 | 18.348   | 14.868   | 21.828  |
| Incidence | China    | Female | Age-standardized | Schizophrenia | Rate   | 2037 | 18.339   | 14.484   | 22.195  |
| Incidence | China    | Female | Age-standardized | Schizophrenia | Rate   | 2038 | 18.330   | 14.086   | 22.574  |
| Incidence | China    | Female | Age-standardized | Schizophrenia | Rate   | 2039 | 18.320   | 13.674   | 22.967  |
| Incidence | China    | Female | Age-standardized | Schizophrenia | Rate   | 2040 | 18.310   | 13.249   | 23.371  |
| Incidence | China    | Female | Age-standardized | Schizophrenia | Rate   | 2041 | 18.299   | 12.811   | 23.786  |
| Incidence | China    | Female | Age-standardized | Schizophrenia | Rate   | 2042 | 18.287   | 12.361   | 24.213  |
| Incidence | China    | Female | Age-standardized | Schizophrenia | Rate   | 2043 | 18.275   | 11.899   | 24.651  |
| Incidence | China    | Female | Age-standardized | Schizophrenia | Rate   | 2044 | 18.263   | 11.425   | 25.100  |
| Incidence | China    | Female | Age-standardized | Schizophrenia | Rate   | 2045 | 18.250   | 10.939   | 25.561  |

|            |       |        |                  |               |      |      |         |         |         |
|------------|-------|--------|------------------|---------------|------|------|---------|---------|---------|
| Incidence  | China | Female | Age-standardized | Schizophrenia | Rate | 2046 | 18.237  | 10.442  | 26.031  |
| Incidence  | China | Female | Age-standardized | Schizophrenia | Rate | 2047 | 18.223  | 9.934   | 26.512  |
| Incidence  | China | Female | Age-standardized | Schizophrenia | Rate | 2048 | 18.209  | 9.415   | 27.003  |
| Incidence  | China | Female | Age-standardized | Schizophrenia | Rate | 2049 | 18.194  | 8.885   | 27.504  |
| Incidence  | China | Female | Age-standardized | Schizophrenia | Rate | 2050 | 18.180  | 8.345   | 28.016  |
| Incidence  | China | Female | Age-standardized | Schizophrenia | Rate | 2051 | 18.166  | 7.794   | 28.537  |
| Incidence  | China | Female | Age-standardized | Schizophrenia | Rate | 2052 | 18.151  | 7.233   | 29.068  |
| Incidence  | China | Both   | Age-standardized | Schizophrenia | Rate | 2024 | 20.668  | 20.067  | 21.269  |
| Incidence  | China | Both   | Age-standardized | Schizophrenia | Rate | 2025 | 20.657  | 19.962  | 21.353  |
| Incidence  | China | Both   | Age-standardized | Schizophrenia | Rate | 2026 | 20.646  | 19.806  | 21.486  |
| Incidence  | China | Both   | Age-standardized | Schizophrenia | Rate | 2027 | 20.635  | 19.605  | 21.664  |
| Incidence  | China | Both   | Age-standardized | Schizophrenia | Rate | 2028 | 20.623  | 19.366  | 21.880  |
| Incidence  | China | Both   | Age-standardized | Schizophrenia | Rate | 2029 | 20.612  | 19.096  | 22.129  |
| Incidence  | China | Both   | Age-standardized | Schizophrenia | Rate | 2030 | 20.602  | 18.798  | 22.406  |
| Incidence  | China | Both   | Age-standardized | Schizophrenia | Rate | 2031 | 20.592  | 18.478  | 22.707  |
| Incidence  | China | Both   | Age-standardized | Schizophrenia | Rate | 2032 | 20.583  | 18.136  | 23.031  |
| Incidence  | China | Both   | Age-standardized | Schizophrenia | Rate | 2033 | 20.576  | 17.775  | 23.377  |
| Incidence  | China | Both   | Age-standardized | Schizophrenia | Rate | 2034 | 20.570  | 17.395  | 23.745  |
| Incidence  | China | Both   | Age-standardized | Schizophrenia | Rate | 2035 | 20.566  | 16.997  | 24.134  |
| Incidence  | China | Both   | Age-standardized | Schizophrenia | Rate | 2036 | 20.563  | 16.583  | 24.543  |
| Incidence  | China | Both   | Age-standardized | Schizophrenia | Rate | 2037 | 20.563  | 16.153  | 24.973  |
| Incidence  | China | Both   | Age-standardized | Schizophrenia | Rate | 2038 | 20.566  | 15.708  | 25.424  |
| Incidence  | China | Both   | Age-standardized | Schizophrenia | Rate | 2039 | 20.572  | 15.247  | 25.896  |
| Incidence  | China | Both   | Age-standardized | Schizophrenia | Rate | 2040 | 20.581  | 14.770  | 26.391  |
| Incidence  | China | Both   | Age-standardized | Schizophrenia | Rate | 2041 | 20.593  | 14.279  | 26.907  |
| Incidence  | China | Both   | Age-standardized | Schizophrenia | Rate | 2042 | 20.609  | 13.772  | 27.446  |
| Incidence  | China | Both   | Age-standardized | Schizophrenia | Rate | 2043 | 20.630  | 13.251  | 28.009  |
| Incidence  | China | Both   | Age-standardized | Schizophrenia | Rate | 2044 | 20.655  | 12.713  | 28.598  |
| Incidence  | China | Both   | Age-standardized | Schizophrenia | Rate | 2045 | 20.686  | 12.160  | 29.212  |
| Incidence  | China | Both   | Age-standardized | Schizophrenia | Rate | 2046 | 20.721  | 11.589  | 29.852  |
| Incidence  | China | Both   | Age-standardized | Schizophrenia | Rate | 2047 | 20.761  | 11.002  | 30.521  |
| Incidence  | China | Both   | Age-standardized | Schizophrenia | Rate | 2048 | 20.808  | 10.397  | 31.219  |
| Incidence  | China | Both   | Age-standardized | Schizophrenia | Rate | 2049 | 20.861  | 9.773   | 31.948  |
| Incidence  | China | Both   | Age-standardized | Schizophrenia | Rate | 2050 | 20.920  | 9.129   | 32.712  |
| Incidence  | China | Both   | Age-standardized | Schizophrenia | Rate | 2051 | 20.987  | 8.465   | 33.509  |
| Incidence  | China | Both   | Age-standardized | Schizophrenia | Rate | 2052 | 21.061  | 7.777   | 34.344  |
| Prevalence | China | Male   | Age-standardized | Schizophrenia | Rate | 2024 | 324.573 | 321.708 | 327.438 |
| Prevalence | China | Male   | Age-standardized | Schizophrenia | Rate | 2025 | 323.987 | 319.066 | 328.908 |
| Prevalence | China | Male   | Age-standardized | Schizophrenia | Rate | 2026 | 323.396 | 315.914 | 330.878 |
| Prevalence | China | Male   | Age-standardized | Schizophrenia | Rate | 2027 | 322.798 | 312.376 | 333.220 |
| Prevalence | China | Male   | Age-standardized | Schizophrenia | Rate | 2028 | 322.197 | 308.508 | 335.885 |
| Prevalence | China | Male   | Age-standardized | Schizophrenia | Rate | 2029 | 321.600 | 304.343 | 338.858 |
| Prevalence | China | Male   | Age-standardized | Schizophrenia | Rate | 2030 | 320.996 | 299.907 | 342.085 |
| Prevalence | China | Male   | Age-standardized | Schizophrenia | Rate | 2031 | 320.386 | 295.230 | 345.541 |
| Prevalence | China | Male   | Age-standardized | Schizophrenia | Rate | 2032 | 319.768 | 290.329 | 349.207 |
| Prevalence | China | Male   | Age-standardized | Schizophrenia | Rate | 2033 | 319.145 | 285.215 | 353.075 |
| Prevalence | China | Male   | Age-standardized | Schizophrenia | Rate | 2034 | 318.525 | 279.897 | 357.153 |
| Prevalence | China | Male   | Age-standardized | Schizophrenia | Rate | 2035 | 317.899 | 274.384 | 361.413 |
| Prevalence | China | Male   | Age-standardized | Schizophrenia | Rate | 2036 | 317.267 | 268.692 | 365.841 |
| Prevalence | China | Male   | Age-standardized | Schizophrenia | Rate | 2037 | 316.626 | 262.826 | 370.425 |
| Prevalence | China | Male   | Age-standardized | Schizophrenia | Rate | 2038 | 315.978 | 256.794 | 375.162 |
| Prevalence | China | Male   | Age-standardized | Schizophrenia | Rate | 2039 | 315.332 | 250.600 | 380.065 |
| Prevalence | China | Male   | Age-standardized | Schizophrenia | Rate | 2040 | 314.683 | 244.251 | 385.116 |
| Prevalence | China | Male   | Age-standardized | Schizophrenia | Rate | 2041 | 314.030 | 237.756 | 390.304 |
| Prevalence | China | Male   | Age-standardized | Schizophrenia | Rate | 2042 | 313.368 | 231.116 | 395.620 |
| Prevalence | China | Male   | Age-standardized | Schizophrenia | Rate | 2043 | 312.698 | 224.336 | 401.060 |

|            |       |        |                  |               |      |      |         |         |         |
|------------|-------|--------|------------------|---------------|------|------|---------|---------|---------|
| Prevalence | China | Male   | Age-standardized | Schizophrenia | Rate | 2044 | 312.029 | 217.419 | 406.639 |
| Prevalence | China | Male   | Age-standardized | Schizophrenia | Rate | 2045 | 311.361 | 210.373 | 412.349 |
| Prevalence | China | Male   | Age-standardized | Schizophrenia | Rate | 2046 | 310.691 | 203.202 | 418.180 |
| Prevalence | China | Male   | Age-standardized | Schizophrenia | Rate | 2047 | 310.013 | 195.906 | 424.121 |
| Prevalence | China | Male   | Age-standardized | Schizophrenia | Rate | 2048 | 309.327 | 188.486 | 430.168 |
| Prevalence | China | Male   | Age-standardized | Schizophrenia | Rate | 2049 | 308.642 | 180.946 | 436.338 |
| Prevalence | China | Male   | Age-standardized | Schizophrenia | Rate | 2050 | 307.961 | 173.294 | 442.628 |
| Prevalence | China | Male   | Age-standardized | Schizophrenia | Rate | 2051 | 307.281 | 165.532 | 449.031 |
| Prevalence | China | Male   | Age-standardized | Schizophrenia | Rate | 2052 | 306.596 | 157.659 | 455.534 |
| Prevalence | China | Female | Age-standardized | Schizophrenia | Rate | 2024 | 279.313 | 276.827 | 281.798 |
| Prevalence | China | Female | Age-standardized | Schizophrenia | Rate | 2025 | 279.126 | 274.876 | 283.376 |
| Prevalence | China | Female | Age-standardized | Schizophrenia | Rate | 2026 | 278.924 | 272.471 | 285.376 |
| Prevalence | China | Female | Age-standardized | Schizophrenia | Rate | 2027 | 278.705 | 269.719 | 287.691 |
| Prevalence | China | Female | Age-standardized | Schizophrenia | Rate | 2028 | 278.476 | 266.670 | 290.281 |
| Prevalence | China | Female | Age-standardized | Schizophrenia | Rate | 2029 | 278.250 | 263.358 | 293.141 |
| Prevalence | China | Female | Age-standardized | Schizophrenia | Rate | 2030 | 278.022 | 259.811 | 296.232 |
| Prevalence | China | Female | Age-standardized | Schizophrenia | Rate | 2031 | 277.786 | 256.047 | 299.526 |
| Prevalence | China | Female | Age-standardized | Schizophrenia | Rate | 2032 | 277.538 | 252.075 | 303.001 |
| Prevalence | China | Female | Age-standardized | Schizophrenia | Rate | 2033 | 277.277 | 247.905 | 306.650 |
| Prevalence | China | Female | Age-standardized | Schizophrenia | Rate | 2034 | 277.013 | 243.545 | 310.481 |
| Prevalence | China | Female | Age-standardized | Schizophrenia | Rate | 2035 | 276.749 | 239.013 | 314.485 |
| Prevalence | China | Female | Age-standardized | Schizophrenia | Rate | 2036 | 276.481 | 234.317 | 318.644 |
| Prevalence | China | Female | Age-standardized | Schizophrenia | Rate | 2037 | 276.202 | 229.459 | 322.945 |
| Prevalence | China | Female | Age-standardized | Schizophrenia | Rate | 2038 | 275.910 | 224.441 | 327.378 |
| Prevalence | China | Female | Age-standardized | Schizophrenia | Rate | 2039 | 275.609 | 219.265 | 331.954 |
| Prevalence | China | Female | Age-standardized | Schizophrenia | Rate | 2040 | 275.310 | 213.948 | 336.672 |
| Prevalence | China | Female | Age-standardized | Schizophrenia | Rate | 2041 | 275.010 | 208.495 | 341.524 |
| Prevalence | China | Female | Age-standardized | Schizophrenia | Rate | 2042 | 274.700 | 202.905 | 346.494 |
| Prevalence | China | Female | Age-standardized | Schizophrenia | Rate | 2043 | 274.376 | 197.177 | 351.575 |
| Prevalence | China | Female | Age-standardized | Schizophrenia | Rate | 2044 | 274.042 | 191.312 | 356.773 |
| Prevalence | China | Female | Age-standardized | Schizophrenia | Rate | 2045 | 273.712 | 185.324 | 362.099 |
| Prevalence | China | Female | Age-standardized | Schizophrenia | Rate | 2046 | 273.382 | 179.218 | 367.545 |
| Prevalence | China | Female | Age-standardized | Schizophrenia | Rate | 2047 | 273.045 | 172.992 | 373.098 |
| Prevalence | China | Female | Age-standardized | Schizophrenia | Rate | 2048 | 272.695 | 166.642 | 378.747 |
| Prevalence | China | Female | Age-standardized | Schizophrenia | Rate | 2049 | 272.334 | 160.169 | 384.499 |
| Prevalence | China | Female | Age-standardized | Schizophrenia | Rate | 2050 | 271.979 | 153.587 | 390.370 |
| Prevalence | China | Female | Age-standardized | Schizophrenia | Rate | 2051 | 271.628 | 146.899 | 396.358 |
| Prevalence | China | Female | Age-standardized | Schizophrenia | Rate | 2052 | 271.274 | 140.102 | 402.446 |
| Prevalence | China | Both   | Age-standardized | Schizophrenia | Rate | 2024 | 302.406 | 297.420 | 307.392 |
| Prevalence | China | Both   | Age-standardized | Schizophrenia | Rate | 2025 | 302.058 | 295.810 | 308.306 |
| Prevalence | China | Both   | Age-standardized | Schizophrenia | Rate | 2026 | 301.709 | 293.526 | 309.893 |
| Prevalence | China | Both   | Age-standardized | Schizophrenia | Rate | 2027 | 301.357 | 290.718 | 311.997 |
| Prevalence | China | Both   | Age-standardized | Schizophrenia | Rate | 2028 | 301.007 | 287.498 | 314.517 |
| Prevalence | China | Both   | Age-standardized | Schizophrenia | Rate | 2029 | 300.677 | 283.945 | 317.409 |
| Prevalence | China | Both   | Age-standardized | Schizophrenia | Rate | 2030 | 300.358 | 280.111 | 320.605 |
| Prevalence | China | Both   | Age-standardized | Schizophrenia | Rate | 2031 | 300.049 | 276.032 | 324.066 |
| Prevalence | China | Both   | Age-standardized | Schizophrenia | Rate | 2032 | 299.745 | 271.723 | 327.767 |
| Prevalence | China | Both   | Age-standardized | Schizophrenia | Rate | 2033 | 299.449 | 267.198 | 331.699 |
| Prevalence | China | Both   | Age-standardized | Schizophrenia | Rate | 2034 | 299.175 | 262.472 | 335.878 |
| Prevalence | China | Both   | Age-standardized | Schizophrenia | Rate | 2035 | 298.922 | 257.561 | 340.284 |
| Prevalence | China | Both   | Age-standardized | Schizophrenia | Rate | 2036 | 298.690 | 252.475 | 344.905 |
| Prevalence | China | Both   | Age-standardized | Schizophrenia | Rate | 2037 | 298.473 | 247.217 | 349.728 |
| Prevalence | China | Both   | Age-standardized | Schizophrenia | Rate | 2038 | 298.272 | 241.787 | 354.757 |
| Prevalence | China | Both   | Age-standardized | Schizophrenia | Rate | 2039 | 298.101 | 236.192 | 360.010 |
| Prevalence | China | Both   | Age-standardized | Schizophrenia | Rate | 2040 | 297.963 | 230.440 | 365.486 |
| Prevalence | China | Both   | Age-standardized | Schizophrenia | Rate | 2041 | 297.857 | 224.536 | 371.179 |

|            |       |        |                  |               |      |      |         |         |         |
|------------|-------|--------|------------------|---------------|------|------|---------|---------|---------|
| Prevalence | China | Both   | Age-standardized | Schizophrenia | Rate | 2042 | 297.779 | 218.476 | 377.083 |
| Prevalence | China | Both   | Age-standardized | Schizophrenia | Rate | 2043 | 297.730 | 212.257 | 383.202 |
| Prevalence | China | Both   | Age-standardized | Schizophrenia | Rate | 2044 | 297.719 | 205.880 | 389.559 |
| Prevalence | China | Both   | Age-standardized | Schizophrenia | Rate | 2045 | 297.756 | 199.350 | 396.163 |
| Prevalence | China | Both   | Age-standardized | Schizophrenia | Rate | 2046 | 297.841 | 192.668 | 403.015 |
| Prevalence | China | Both   | Age-standardized | Schizophrenia | Rate | 2047 | 297.968 | 185.825 | 410.111 |
| Prevalence | China | Both   | Age-standardized | Schizophrenia | Rate | 2048 | 298.136 | 178.814 | 417.459 |
| Prevalence | China | Both   | Age-standardized | Schizophrenia | Rate | 2049 | 298.357 | 171.632 | 425.082 |
| Prevalence | China | Both   | Age-standardized | Schizophrenia | Rate | 2050 | 298.641 | 164.280 | 433.002 |
| Prevalence | China | Both   | Age-standardized | Schizophrenia | Rate | 2051 | 298.990 | 156.753 | 441.227 |
| Prevalence | China | Both   | Age-standardized | Schizophrenia | Rate | 2052 | 299.398 | 149.039 | 449.757 |
| DALYs      | China | Male   | Age-standardized | Schizophrenia | Rate | 2024 | 209.137 | 207.218 | 211.056 |
| DALYs      | China | Male   | Age-standardized | Schizophrenia | Rate | 2025 | 208.751 | 205.460 | 212.042 |
| DALYs      | China | Male   | Age-standardized | Schizophrenia | Rate | 2026 | 208.359 | 203.362 | 213.355 |
| DALYs      | China | Male   | Age-standardized | Schizophrenia | Rate | 2027 | 207.963 | 201.009 | 214.918 |
| DALYs      | China | Male   | Age-standardized | Schizophrenia | Rate | 2028 | 207.563 | 198.434 | 216.692 |
| DALYs      | China | Male   | Age-standardized | Schizophrenia | Rate | 2029 | 207.163 | 195.659 | 218.666 |
| DALYs      | China | Male   | Age-standardized | Schizophrenia | Rate | 2030 | 206.761 | 192.708 | 220.814 |
| DALYs      | China | Male   | Age-standardized | Schizophrenia | Rate | 2031 | 206.353 | 189.595 | 223.111 |
| DALYs      | China | Male   | Age-standardized | Schizophrenia | Rate | 2032 | 205.940 | 186.333 | 225.548 |
| DALYs      | China | Male   | Age-standardized | Schizophrenia | Rate | 2033 | 205.522 | 182.928 | 228.116 |
| DALYs      | China | Male   | Age-standardized | Schizophrenia | Rate | 2034 | 205.103 | 179.385 | 230.820 |
| DALYs      | China | Male   | Age-standardized | Schizophrenia | Rate | 2035 | 204.682 | 175.717 | 233.648 |
| DALYs      | China | Male   | Age-standardized | Schizophrenia | Rate | 2036 | 204.256 | 171.926 | 236.585 |
| DALYs      | China | Male   | Age-standardized | Schizophrenia | Rate | 2037 | 203.824 | 168.022 | 239.626 |
| DALYs      | China | Male   | Age-standardized | Schizophrenia | Rate | 2038 | 203.385 | 164.005 | 242.765 |
| DALYs      | China | Male   | Age-standardized | Schizophrenia | Rate | 2039 | 202.945 | 159.880 | 246.011 |
| DALYs      | China | Male   | Age-standardized | Schizophrenia | Rate | 2040 | 202.506 | 155.654 | 249.358 |
| DALYs      | China | Male   | Age-standardized | Schizophrenia | Rate | 2041 | 202.061 | 151.329 | 252.793 |
| DALYs      | China | Male   | Age-standardized | Schizophrenia | Rate | 2042 | 201.612 | 146.910 | 256.313 |
| DALYs      | China | Male   | Age-standardized | Schizophrenia | Rate | 2043 | 201.155 | 142.396 | 259.913 |
| DALYs      | China | Male   | Age-standardized | Schizophrenia | Rate | 2044 | 200.697 | 137.791 | 263.603 |
| DALYs      | China | Male   | Age-standardized | Schizophrenia | Rate | 2045 | 200.242 | 133.102 | 267.381 |
| DALYs      | China | Male   | Age-standardized | Schizophrenia | Rate | 2046 | 199.783 | 128.329 | 271.236 |
| DALYs      | China | Male   | Age-standardized | Schizophrenia | Rate | 2047 | 199.320 | 123.475 | 275.165 |
| DALYs      | China | Male   | Age-standardized | Schizophrenia | Rate | 2048 | 198.850 | 118.537 | 279.162 |
| DALYs      | China | Male   | Age-standardized | Schizophrenia | Rate | 2049 | 198.379 | 113.521 | 283.238 |
| DALYs      | China | Male   | Age-standardized | Schizophrenia | Rate | 2050 | 197.912 | 108.431 | 287.394 |
| DALYs      | China | Male   | Age-standardized | Schizophrenia | Rate | 2051 | 197.444 | 103.267 | 291.621 |
| DALYs      | China | Male   | Age-standardized | Schizophrenia | Rate | 2052 | 196.973 | 98.031  | 295.916 |
| DALYs      | China | Female | Age-standardized | Schizophrenia | Rate | 2024 | 177.716 | 176.061 | 179.372 |
| DALYs      | China | Female | Age-standardized | Schizophrenia | Rate | 2025 | 177.456 | 174.640 | 180.272 |
| DALYs      | China | Female | Age-standardized | Schizophrenia | Rate | 2026 | 177.187 | 172.927 | 181.447 |
| DALYs      | China | Female | Age-standardized | Schizophrenia | Rate | 2027 | 176.908 | 170.990 | 182.826 |
| DALYs      | China | Female | Age-standardized | Schizophrenia | Rate | 2028 | 176.620 | 168.860 | 184.381 |
| DALYs      | China | Female | Age-standardized | Schizophrenia | Rate | 2029 | 176.340 | 166.566 | 186.114 |
| DALYs      | China | Female | Age-standardized | Schizophrenia | Rate | 2030 | 176.054 | 164.118 | 187.990 |
| DALYs      | China | Female | Age-standardized | Schizophrenia | Rate | 2031 | 175.764 | 161.532 | 189.995 |
| DALYs      | China | Female | Age-standardized | Schizophrenia | Rate | 2032 | 175.465 | 158.816 | 192.114 |
| DALYs      | China | Female | Age-standardized | Schizophrenia | Rate | 2033 | 175.156 | 155.971 | 194.341 |
| DALYs      | China | Female | Age-standardized | Schizophrenia | Rate | 2034 | 174.849 | 153.011 | 196.687 |
| DALYs      | China | Female | Age-standardized | Schizophrenia | Rate | 2035 | 174.536 | 149.938 | 199.133 |
| DALYs      | China | Female | Age-standardized | Schizophrenia | Rate | 2036 | 174.220 | 146.763 | 201.676 |
| DALYs      | China | Female | Age-standardized | Schizophrenia | Rate | 2037 | 173.896 | 143.488 | 204.305 |
| DALYs      | China | Female | Age-standardized | Schizophrenia | Rate | 2038 | 173.562 | 140.111 | 207.013 |
| DALYs      | China | Female | Age-standardized | Schizophrenia | Rate | 2039 | 173.226 | 136.641 | 209.812 |

|       |       |        |                  |               |      |      |         |         |         |
|-------|-------|--------|------------------|---------------|------|------|---------|---------|---------|
| DALYs | China | Female | Age-standardized | Schizophrenia | Rate | 2040 | 172.885 | 133.079 | 212.690 |
| DALYs | China | Female | Age-standardized | Schizophrenia | Rate | 2041 | 172.541 | 129.435 | 215.648 |
| DALYs | China | Female | Age-standardized | Schizophrenia | Rate | 2042 | 172.191 | 125.707 | 218.676 |
| DALYs | China | Female | Age-standardized | Schizophrenia | Rate | 2043 | 171.831 | 121.894 | 221.767 |
| DALYs | China | Female | Age-standardized | Schizophrenia | Rate | 2044 | 171.467 | 118.002 | 224.932 |
| DALYs | China | Female | Age-standardized | Schizophrenia | Rate | 2045 | 171.098 | 114.033 | 228.164 |
| DALYs | China | Female | Age-standardized | Schizophrenia | Rate | 2046 | 170.730 | 109.993 | 231.466 |
| DALYs | China | Female | Age-standardized | Schizophrenia | Rate | 2047 | 170.356 | 105.883 | 234.829 |
| DALYs | China | Female | Age-standardized | Schizophrenia | Rate | 2048 | 169.973 | 101.699 | 238.247 |
| DALYs | China | Female | Age-standardized | Schizophrenia | Rate | 2049 | 169.586 | 97.446  | 241.725 |
| DALYs | China | Female | Age-standardized | Schizophrenia | Rate | 2050 | 169.196 | 93.127  | 245.266 |
| DALYs | China | Female | Age-standardized | Schizophrenia | Rate | 2051 | 168.809 | 88.747  | 248.871 |
| DALYs | China | Female | Age-standardized | Schizophrenia | Rate | 2052 | 168.419 | 84.304  | 252.533 |
| DALYs | China | Both   | Age-standardized | Schizophrenia | Rate | 2024 | 193.747 | 190.390 | 197.105 |
| DALYs | China | Both   | Age-standardized | Schizophrenia | Rate | 2025 | 193.452 | 189.261 | 197.643 |
| DALYs | China | Both   | Age-standardized | Schizophrenia | Rate | 2026 | 193.156 | 187.689 | 198.622 |
| DALYs | China | Both   | Age-standardized | Schizophrenia | Rate | 2027 | 192.859 | 185.773 | 199.944 |
| DALYs | China | Both   | Age-standardized | Schizophrenia | Rate | 2028 | 192.562 | 183.584 | 201.539 |
| DALYs | China | Both   | Age-standardized | Schizophrenia | Rate | 2029 | 192.279 | 181.177 | 203.380 |
| DALYs | China | Both   | Age-standardized | Schizophrenia | Rate | 2030 | 192.003 | 178.585 | 205.421 |
| DALYs | China | Both   | Age-standardized | Schizophrenia | Rate | 2031 | 191.734 | 175.832 | 207.636 |
| DALYs | China | Both   | Age-standardized | Schizophrenia | Rate | 2032 | 191.469 | 172.930 | 210.008 |
| DALYs | China | Both   | Age-standardized | Schizophrenia | Rate | 2033 | 191.207 | 169.885 | 212.530 |
| DALYs | China | Both   | Age-standardized | Schizophrenia | Rate | 2034 | 190.962 | 166.710 | 215.214 |
| DALYs | China | Both   | Age-standardized | Schizophrenia | Rate | 2035 | 190.730 | 163.414 | 218.045 |
| DALYs | China | Both   | Age-standardized | Schizophrenia | Rate | 2036 | 190.510 | 160.004 | 221.016 |
| DALYs | China | Both   | Age-standardized | Schizophrenia | Rate | 2037 | 190.301 | 156.482 | 224.119 |
| DALYs | China | Both   | Age-standardized | Schizophrenia | Rate | 2038 | 190.101 | 152.848 | 227.355 |
| DALYs | China | Both   | Age-standardized | Schizophrenia | Rate | 2039 | 189.922 | 149.106 | 230.737 |
| DALYs | China | Both   | Age-standardized | Schizophrenia | Rate | 2040 | 189.764 | 145.263 | 234.264 |
| DALYs | China | Both   | Age-standardized | Schizophrenia | Rate | 2041 | 189.626 | 141.321 | 237.931 |
| DALYs | China | Both   | Age-standardized | Schizophrenia | Rate | 2042 | 189.507 | 137.278 | 241.736 |
| DALYs | China | Both   | Age-standardized | Schizophrenia | Rate | 2043 | 189.406 | 133.132 | 245.681 |
| DALYs | China | Both   | Age-standardized | Schizophrenia | Rate | 2044 | 189.332 | 128.883 | 249.781 |
| DALYs | China | Both   | Age-standardized | Schizophrenia | Rate | 2045 | 189.289 | 124.535 | 254.042 |
| DALYs | China | Both   | Age-standardized | Schizophrenia | Rate | 2046 | 189.276 | 120.087 | 258.464 |
| DALYs | China | Both   | Age-standardized | Schizophrenia | Rate | 2047 | 189.291 | 115.535 | 263.048 |
| DALYs | China | Both   | Age-standardized | Schizophrenia | Rate | 2048 | 189.335 | 110.874 | 267.796 |
| DALYs | China | Both   | Age-standardized | Schizophrenia | Rate | 2049 | 189.414 | 106.101 | 272.726 |
| DALYs | China | Both   | Age-standardized | Schizophrenia | Rate | 2050 | 189.533 | 101.216 | 277.851 |
| DALYs | China | Both   | Age-standardized | Schizophrenia | Rate | 2051 | 189.695 | 96.215  | 283.174 |
| DALYs | China | Both   | Age-standardized | Schizophrenia | Rate | 2052 | 189.897 | 91.092  | 288.701 |

**Supplementary Table S6. The comparison between predict ASR in 2016-2023 and actual values**

| measure    | location | sex    | age              | cause         | metric | year | pred    | origin  |
|------------|----------|--------|------------------|---------------|--------|------|---------|---------|
| Incidence  | China    | Male   | Age-standardized | Schizophrenia | Rate   | 2016 | 22.647  | 22.834  |
| Incidence  | China    | Male   | Age-standardized | Schizophrenia | Rate   | 2017 | 22.592  | 22.841  |
| Incidence  | China    | Male   | Age-standardized | Schizophrenia | Rate   | 2018 | 22.537  | 22.848  |
| Incidence  | China    | Male   | Age-standardized | Schizophrenia | Rate   | 2019 | 22.479  | 22.855  |
| Incidence  | China    | Male   | Age-standardized | Schizophrenia | Rate   | 2020 | 22.423  | 22.862  |
| Incidence  | China    | Male   | Age-standardized | Schizophrenia | Rate   | 2021 | 22.367  | 22.845  |
| Incidence  | China    | Male   | Age-standardized | Schizophrenia | Rate   | 2022 | 22.311  | 22.822  |
| Incidence  | China    | Male   | Age-standardized | Schizophrenia | Rate   | 2023 | 22.254  | 22.774  |
| Incidence  | China    | Female | Age-standardized | Schizophrenia | Rate   | 2016 | 18.241  | 18.396  |
| Incidence  | China    | Female | Age-standardized | Schizophrenia | Rate   | 2017 | 18.195  | 18.410  |
| Incidence  | China    | Female | Age-standardized | Schizophrenia | Rate   | 2018 | 18.148  | 18.425  |
| Incidence  | China    | Female | Age-standardized | Schizophrenia | Rate   | 2019 | 18.099  | 18.437  |
| Incidence  | China    | Female | Age-standardized | Schizophrenia | Rate   | 2020 | 18.049  | 18.444  |
| Incidence  | China    | Female | Age-standardized | Schizophrenia | Rate   | 2021 | 17.999  | 18.438  |
| Incidence  | China    | Female | Age-standardized | Schizophrenia | Rate   | 2022 | 17.949  | 18.430  |
| Incidence  | China    | Female | Age-standardized | Schizophrenia | Rate   | 2023 | 17.897  | 18.422  |
| Incidence  | China    | Both   | Age-standardized | Schizophrenia | Rate   | 2016 | 20.500  | 20.670  |
| Incidence  | China    | Both   | Age-standardized | Schizophrenia | Rate   | 2017 | 20.460  | 20.686  |
| Incidence  | China    | Both   | Age-standardized | Schizophrenia | Rate   | 2018 | 20.430  | 20.703  |
| Incidence  | China    | Both   | Age-standardized | Schizophrenia | Rate   | 2019 | 20.390  | 20.719  |
| Incidence  | China    | Both   | Age-standardized | Schizophrenia | Rate   | 2020 | 20.350  | 20.731  |
| Incidence  | China    | Both   | Age-standardized | Schizophrenia | Rate   | 2021 | 20.320  | 20.725  |
| Incidence  | China    | Both   | Age-standardized | Schizophrenia | Rate   | 2022 | 20.290  | 20.713  |
| Incidence  | China    | Both   | Age-standardized | Schizophrenia | Rate   | 2023 | 20.260  | 20.690  |
| Prevalence | China    | Male   | Age-standardized | Schizophrenia | Rate   | 2016 | 325.443 | 325.752 |
| Prevalence | China    | Male   | Age-standardized | Schizophrenia | Rate   | 2017 | 325.396 | 325.746 |
| Prevalence | China    | Male   | Age-standardized | Schizophrenia | Rate   | 2018 | 325.316 | 325.718 |
| Prevalence | China    | Male   | Age-standardized | Schizophrenia | Rate   | 2019 | 325.205 | 325.685 |
| Prevalence | China    | Male   | Age-standardized | Schizophrenia | Rate   | 2020 | 325.079 | 325.664 |
| Prevalence | China    | Male   | Age-standardized | Schizophrenia | Rate   | 2021 | 324.941 | 325.465 |
| Prevalence | China    | Male   | Age-standardized | Schizophrenia | Rate   | 2022 | 324.782 | 325.196 |
| Prevalence | China    | Male   | Age-standardized | Schizophrenia | Rate   | 2023 | 324.592 | 324.399 |
| Prevalence | China    | Female | Age-standardized | Schizophrenia | Rate   | 2016 | 278.700 | 279.193 |
| Prevalence | China    | Female | Age-standardized | Schizophrenia | Rate   | 2017 | 278.583 | 279.248 |
| Prevalence | China    | Female | Age-standardized | Schizophrenia | Rate   | 2018 | 278.422 | 279.299 |
| Prevalence | China    | Female | Age-standardized | Schizophrenia | Rate   | 2019 | 278.225 | 279.342 |
| Prevalence | China    | Female | Age-standardized | Schizophrenia | Rate   | 2020 | 278.008 | 279.366 |
| Prevalence | China    | Female | Age-standardized | Schizophrenia | Rate   | 2021 | 277.771 | 279.366 |
| Prevalence | China    | Female | Age-standardized | Schizophrenia | Rate   | 2022 | 277.499 | 279.323 |
| Prevalence | China    | Female | Age-standardized | Schizophrenia | Rate   | 2023 | 277.189 | 278.859 |
| Prevalence | China    | Both   | Age-standardized | Schizophrenia | Rate   | 2016 | 298.470 | 302.887 |
| Prevalence | China    | Both   | Age-standardized | Schizophrenia | Rate   | 2017 | 298.460 | 302.951 |
| Prevalence | China    | Both   | Age-standardized | Schizophrenia | Rate   | 2018 | 298.450 | 303.008 |
| Prevalence | China    | Both   | Age-standardized | Schizophrenia | Rate   | 2019 | 298.440 | 303.065 |
| Prevalence | China    | Both   | Age-standardized | Schizophrenia | Rate   | 2020 | 298.450 | 303.122 |
| Prevalence | China    | Both   | Age-standardized | Schizophrenia | Rate   | 2021 | 298.480 | 303.073 |
| Prevalence | China    | Both   | Age-standardized | Schizophrenia | Rate   | 2022 | 298.520 | 302.967 |
| Prevalence | China    | Both   | Age-standardized | Schizophrenia | Rate   | 2023 | 298.570 | 302.386 |

|       |       |        |                  |                    |      |         |         |
|-------|-------|--------|------------------|--------------------|------|---------|---------|
| DALYs | China | Male   | Age-standardized | Schizophrenia Rate | 2016 | 208.999 | 209.263 |
| DALYs | China | Male   | Age-standardized | Schizophrenia Rate | 2017 | 208.928 | 209.509 |
| DALYs | China | Male   | Age-standardized | Schizophrenia Rate | 2018 | 208.838 | 209.755 |
| DALYs | China | Male   | Age-standardized | Schizophrenia Rate | 2019 | 208.734 | 210.040 |
| DALYs | China | Male   | Age-standardized | Schizophrenia Rate | 2020 | 208.627 | 210.079 |
| DALYs | China | Male   | Age-standardized | Schizophrenia Rate | 2021 | 208.512 | 209.799 |
| DALYs | China | Male   | Age-standardized | Schizophrenia Rate | 2022 | 208.387 | 209.635 |
| DALYs | China | Male   | Age-standardized | Schizophrenia Rate | 2023 | 208.249 | 209.141 |
| DALYs | China | Female | Age-standardized | Schizophrenia Rate | 2016 | 177.034 | 177.717 |
| DALYs | China | Female | Age-standardized | Schizophrenia Rate | 2017 | 176.841 | 177.827 |
| DALYs | China | Female | Age-standardized | Schizophrenia Rate | 2018 | 176.623 | 178.127 |
| DALYs | China | Female | Age-standardized | Schizophrenia Rate | 2019 | 176.390 | 178.202 |
| DALYs | China | Female | Age-standardized | Schizophrenia Rate | 2020 | 176.139 | 178.103 |
| DALYs | China | Female | Age-standardized | Schizophrenia Rate | 2021 | 175.869 | 178.217 |
| DALYs | China | Female | Age-standardized | Schizophrenia Rate | 2022 | 175.576 | 178.183 |
| DALYs | China | Female | Age-standardized | Schizophrenia Rate | 2023 | 175.263 | 177.612 |
| DALYs | China | Both   | Age-standardized | Schizophrenia Rate | 2016 | 191.140 | 193.769 |
| DALYs | China | Both   | Age-standardized | Schizophrenia Rate | 2017 | 191.060 | 193.975 |
| DALYs | China | Both   | Age-standardized | Schizophrenia Rate | 2018 | 190.980 | 194.281 |
| DALYs | China | Both   | Age-standardized | Schizophrenia Rate | 2019 | 190.920 | 194.499 |
| DALYs | China | Both   | Age-standardized | Schizophrenia Rate | 2020 | 190.860 | 194.512 |
| DALYs | China | Both   | Age-standardized | Schizophrenia Rate | 2021 | 190.820 | 194.459 |
| DALYs | China | Both   | Age-standardized | Schizophrenia Rate | 2022 | 190.780 | 194.395 |
| DALYs | China | Both   | Age-standardized | Schizophrenia Rate | 2023 | 190.760 | 193.900 |

**Supplementary Table S7. Retrospective validation of the BAPC model for schizophrenia burden indicators in the total population using MAE, RMSE, and MAPE**

| <b>Measure</b>    | <b>Sex</b>    | <b>MAE</b> | <b>RMSE</b> | <b>MAPE(%)</b> |
|-------------------|---------------|------------|-------------|----------------|
| <b>Incidence</b>  | <b>Both</b>   | 0.33       | 0.34        | 1.59           |
|                   | <b>Male</b>   | 0.38       | 0.40        | 1.68           |
|                   | <b>Female</b> | 0.35       | 0.37        | 1.92           |
| <b>Prevalence</b> | <b>Both</b>   | 4.45       | 4.46        | 1.47           |
|                   | <b>Male</b>   | 0.41       | 0.42        | 0.12           |
|                   | <b>Female</b> | 1.20       | 1.29        | 0.43           |
| <b>DALYs</b>      | <b>Both</b>   | 3.31       | 3.33        | 1.70           |
|                   | <b>Male</b>   | 0.99       | 1.06        | 0.47           |
|                   | <b>Female</b> | 1.78       | 1.89        | 1.00           |

**Supplementary Table S8. Longitudinal age curves of schizophrenia incidence, prevalence, and DALYs rates in China estimated by the APC model, 2023–2052**

| measure    | location | sex    | cause         | Age label     | Rate    | CI <sub>Lo</sub> | CI <sub>Hi</sub> |
|------------|----------|--------|---------------|---------------|---------|------------------|------------------|
| Incidence  | China    | Male   | Schizophrenia | 12.5 10 to 14 | 6.985   | 6.910            | 7.060            |
| Incidence  | China    | Male   | Schizophrenia | 17.5 15 to 19 | 31.608  | 31.399           | 31.819           |
| Incidence  | China    | Male   | Schizophrenia | 22.5 20 to 24 | 51.980  | 51.681           | 52.282           |
| Incidence  | China    | Male   | Schizophrenia | 27.5 25 to 29 | 42.510  | 42.273           | 42.749           |
| Incidence  | China    | Male   | Schizophrenia | 32.5 30 to 34 | 32.739  | 32.575           | 32.903           |
| Incidence  | China    | Male   | Schizophrenia | 37.5 35 to 39 | 26.949  | 26.816           | 27.082           |
| Incidence  | China    | Male   | Schizophrenia | 42.5 40 to 44 | 24.951  | 24.829           | 25.073           |
| Incidence  | China    | Male   | Schizophrenia | 47.5 45 to 49 | 26.897  | 26.769           | 27.026           |
| Incidence  | China    | Male   | Schizophrenia | 52.5 50 to 54 | 28.838  | 28.700           | 28.976           |
| Incidence  | China    | Male   | Schizophrenia | 57.5 55 to 59 | 30.688  | 30.539           | 30.839           |
| Incidence  | China    | Male   | Schizophrenia | 62.5 60 to 64 | 27.608  | 27.452           | 27.765           |
| Incidence  | China    | Male   | Schizophrenia | 67.5 65 to 69 | 19.690  | 19.559           | 19.821           |
| Incidence  | China    | Male   | Schizophrenia | 72.5 70 to 74 | 11.787  | 11.688           | 11.887           |
| Incidence  | China    | Male   | Schizophrenia | 77.5 75 to 79 | 3.908   | 3.852            | 3.964            |
| Incidence  | China    | Female | Schizophrenia | 12.5 10 to 14 | 6.017   | 5.925            | 6.112            |
| Incidence  | China    | Female | Schizophrenia | 17.5 15 to 19 | 25.587  | 25.340           | 25.837           |
| Incidence  | China    | Female | Schizophrenia | 22.5 20 to 24 | 40.467  | 40.126           | 40.810           |
| Incidence  | China    | Female | Schizophrenia | 27.5 25 to 29 | 32.931  | 32.663           | 33.201           |
| Incidence  | China    | Female | Schizophrenia | 32.5 30 to 34 | 26.190  | 26.001           | 26.380           |
| Incidence  | China    | Female | Schizophrenia | 37.5 35 to 39 | 23.003  | 22.844           | 23.163           |
| Incidence  | China    | Female | Schizophrenia | 42.5 40 to 44 | 21.845  | 21.696           | 21.994           |
| Incidence  | China    | Female | Schizophrenia | 47.5 45 to 49 | 22.960  | 22.807           | 23.114           |
| Incidence  | China    | Female | Schizophrenia | 52.5 50 to 54 | 24.079  | 23.919           | 24.240           |
| Incidence  | China    | Female | Schizophrenia | 57.5 55 to 59 | 25.152  | 24.981           | 25.324           |
| Incidence  | China    | Female | Schizophrenia | 62.5 60 to 64 | 22.561  | 22.384           | 22.739           |
| Incidence  | China    | Female | Schizophrenia | 67.5 65 to 69 | 16.272  | 16.124           | 16.422           |
| Incidence  | China    | Female | Schizophrenia | 72.5 70 to 74 | 9.860   | 9.749            | 9.973            |
| Incidence  | China    | Female | Schizophrenia | 77.5 75 to 79 | 3.309   | 3.248            | 3.370            |
| Incidence  | China    | Both   | Schizophrenia | 12.5 10 to 14 | 6.509   | 6.427            | 6.593            |
| Incidence  | China    | Both   | Schizophrenia | 17.5 15 to 19 | 28.687  | 28.460           | 28.915           |
| Incidence  | China    | Both   | Schizophrenia | 22.5 20 to 24 | 46.426  | 46.106           | 46.747           |
| Incidence  | China    | Both   | Schizophrenia | 27.5 25 to 29 | 37.886  | 37.633           | 38.140           |
| Incidence  | China    | Both   | Schizophrenia | 32.5 30 to 34 | 29.553  | 29.377           | 29.729           |
| Incidence  | China    | Both   | Schizophrenia | 37.5 35 to 39 | 25.006  | 24.861           | 25.151           |
| Incidence  | China    | Both   | Schizophrenia | 42.5 40 to 44 | 23.414  | 23.281           | 23.549           |
| Incidence  | China    | Both   | Schizophrenia | 47.5 45 to 49 | 24.952  | 24.812           | 25.092           |
| Incidence  | China    | Both   | Schizophrenia | 52.5 50 to 54 | 26.475  | 26.327           | 26.624           |
| Incidence  | China    | Both   | Schizophrenia | 57.5 55 to 59 | 27.918  | 27.758           | 28.078           |
| Incidence  | China    | Both   | Schizophrenia | 62.5 60 to 64 | 25.049  | 24.883           | 25.216           |
| Incidence  | China    | Both   | Schizophrenia | 67.5 65 to 69 | 17.913  | 17.775           | 18.053           |
| Incidence  | China    | Both   | Schizophrenia | 72.5 70 to 74 | 10.750  | 10.646           | 10.855           |
| Incidence  | China    | Both   | Schizophrenia | 77.5 75 to 79 | 3.570   | 3.513            | 3.628            |
| Prevalence | China    | Male   | Schizophrenia | 12.5 10 to 14 | 11.590  | 11.362           | 11.823           |
| Prevalence | China    | Male   | Schizophrenia | 17.5 15 to 19 | 89.802  | 89.122           | 90.488           |
| Prevalence | China    | Male   | Schizophrenia | 22.5 20 to 24 | 286.374 | 285.004          | 287.752          |
| Prevalence | China    | Male   | Schizophrenia | 27.5 25 to 29 | 452.529 | 450.748          | 454.316          |
| Prevalence | China    | Male   | Schizophrenia | 32.5 30 to 34 | 536.041 | 534.318          | 537.769          |
| Prevalence | China    | Male   | Schizophrenia | 37.5 35 to 39 | 570.088 | 568.411          | 571.770          |
| Prevalence | China    | Male   | Schizophrenia | 42.5 40 to 44 | 572.593 | 570.964          | 574.228          |
| Prevalence | China    | Male   | Schizophrenia | 47.5 45 to 49 | 570.381 | 568.761          | 572.006          |
| Prevalence | China    | Male   | Schizophrenia | 52.5 50 to 54 | 567.948 | 566.308          | 569.593          |
| Prevalence | China    | Male   | Schizophrenia | 57.5 55 to 59 | 564.019 | 562.331          | 565.712          |
| Prevalence | China    | Male   | Schizophrenia | 62.5 60 to 64 | 551.986 | 550.114          | 553.865          |

|            |       |        |               |      |          |         |         |         |
|------------|-------|--------|---------------|------|----------|---------|---------|---------|
| Prevalence | China | Male   | Schizophrenia | 67.5 | 65 to 69 | 505.811 | 503.919 | 507.710 |
| Prevalence | China | Male   | Schizophrenia | 72.5 | 70 to 74 | 429.466 | 427.649 | 431.291 |
| Prevalence | China | Male   | Schizophrenia | 77.5 | 75 to 79 | 333.645 | 331.963 | 335.335 |
| Prevalence | China | Female | Schizophrenia | 12.5 | 10 to 14 | 9.995   | 9.699   | 10.300  |
| Prevalence | China | Female | Schizophrenia | 17.5 | 15 to 19 | 75.547  | 74.673  | 76.431  |
| Prevalence | China | Female | Schizophrenia | 22.5 | 20 to 24 | 231.568 | 229.866 | 233.282 |
| Prevalence | China | Female | Schizophrenia | 27.5 | 25 to 29 | 364.096 | 361.919 | 366.286 |
| Prevalence | China | Female | Schizophrenia | 32.5 | 30 to 34 | 436.848 | 434.745 | 438.961 |
| Prevalence | China | Female | Schizophrenia | 37.5 | 35 to 39 | 477.506 | 475.449 | 479.572 |
| Prevalence | China | Female | Schizophrenia | 42.5 | 40 to 44 | 495.206 | 493.173 | 497.249 |
| Prevalence | China | Female | Schizophrenia | 47.5 | 45 to 49 | 506.337 | 504.287 | 508.395 |
| Prevalence | China | Female | Schizophrenia | 52.5 | 50 to 54 | 513.830 | 511.740 | 515.929 |
| Prevalence | China | Female | Schizophrenia | 57.5 | 55 to 59 | 517.312 | 515.153 | 519.480 |
| Prevalence | China | Female | Schizophrenia | 62.5 | 60 to 64 | 511.952 | 509.544 | 514.372 |
| Prevalence | China | Female | Schizophrenia | 67.5 | 65 to 69 | 477.851 | 475.406 | 480.309 |
| Prevalence | China | Female | Schizophrenia | 72.5 | 70 to 74 | 417.278 | 414.915 | 419.655 |
| Prevalence | China | Female | Schizophrenia | 77.5 | 75 to 79 | 337.170 | 334.978 | 339.376 |
| Prevalence | China | Both   | Schizophrenia | 12.5 | 10 to 14 | 10.805  | 10.548  | 11.069  |
| Prevalence | China | Both   | Schizophrenia | 17.5 | 15 to 19 | 82.833  | 82.070  | 83.603  |
| Prevalence | China | Both   | Schizophrenia | 22.5 | 20 to 24 | 259.809 | 258.294 | 261.333 |
| Prevalence | China | Both   | Schizophrenia | 27.5 | 25 to 29 | 409.673 | 407.717 | 411.638 |
| Prevalence | China | Both   | Schizophrenia | 32.5 | 30 to 34 | 487.725 | 485.835 | 489.623 |
| Prevalence | China | Both   | Schizophrenia | 37.5 | 35 to 39 | 524.654 | 522.811 | 526.503 |
| Prevalence | China | Both   | Schizophrenia | 42.5 | 40 to 44 | 534.405 | 532.600 | 536.216 |
| Prevalence | China | Both   | Schizophrenia | 47.5 | 45 to 49 | 538.659 | 536.854 | 540.471 |
| Prevalence | China | Both   | Schizophrenia | 52.5 | 50 to 54 | 541.040 | 539.207 | 542.879 |
| Prevalence | China | Both   | Schizophrenia | 57.5 | 55 to 59 | 540.651 | 538.761 | 542.546 |
| Prevalence | China | Both   | Schizophrenia | 62.5 | 60 to 64 | 531.670 | 529.571 | 533.778 |
| Prevalence | China | Both   | Schizophrenia | 67.5 | 65 to 69 | 491.145 | 489.021 | 493.279 |
| Prevalence | China | Both   | Schizophrenia | 72.5 | 70 to 74 | 422.535 | 420.490 | 424.589 |
| Prevalence | China | Both   | Schizophrenia | 77.5 | 75 to 79 | 334.843 | 332.951 | 336.746 |
| DALYs      | China | Male   | Schizophrenia | 12.5 | 10 to 14 | 8.185   | 8.031   | 8.342   |
| DALYs      | China | Male   | Schizophrenia | 17.5 | 15 to 19 | 60.971  | 60.520  | 61.425  |
| DALYs      | China | Male   | Schizophrenia | 22.5 | 20 to 24 | 193.301 | 192.393 | 194.214 |
| DALYs      | China | Male   | Schizophrenia | 27.5 | 25 to 29 | 302.786 | 301.612 | 303.966 |
| DALYs      | China | Male   | Schizophrenia | 32.5 | 30 to 34 | 356.183 | 355.052 | 357.317 |
| DALYs      | China | Male   | Schizophrenia | 37.5 | 35 to 39 | 375.475 | 374.380 | 376.573 |
| DALYs      | China | Male   | Schizophrenia | 42.5 | 40 to 44 | 373.259 | 372.201 | 374.319 |
| DALYs      | China | Male   | Schizophrenia | 47.5 | 45 to 49 | 367.008 | 365.965 | 368.053 |
| DALYs      | China | Male   | Schizophrenia | 52.5 | 50 to 54 | 360.556 | 359.511 | 361.605 |
| DALYs      | China | Male   | Schizophrenia | 57.5 | 55 to 59 | 352.791 | 351.727 | 353.858 |
| DALYs      | China | Male   | Schizophrenia | 62.5 | 60 to 64 | 338.477 | 337.316 | 339.643 |
| DALYs      | China | Male   | Schizophrenia | 67.5 | 65 to 69 | 302.703 | 301.549 | 303.862 |
| DALYs      | China | Male   | Schizophrenia | 72.5 | 70 to 74 | 250.578 | 249.487 | 251.675 |
| DALYs      | China | Male   | Schizophrenia | 77.5 | 75 to 79 | 189.730 | 188.733 | 190.732 |
| DALYs      | China | Female | Schizophrenia | 12.5 | 10 to 14 | 7.173   | 6.970   | 7.383   |
| DALYs      | China | Female | Schizophrenia | 17.5 | 15 to 19 | 51.446  | 50.863  | 52.036  |
| DALYs      | China | Female | Schizophrenia | 22.5 | 20 to 24 | 155.962 | 154.832 | 157.102 |
| DALYs      | China | Female | Schizophrenia | 27.5 | 25 to 29 | 241.644 | 240.211 | 243.086 |
| DALYs      | China | Female | Schizophrenia | 32.5 | 30 to 34 | 286.346 | 284.976 | 287.721 |
| DALYs      | China | Female | Schizophrenia | 37.5 | 35 to 39 | 309.133 | 307.805 | 310.468 |
| DALYs      | China | Female | Schizophrenia | 42.5 | 40 to 44 | 316.510 | 315.208 | 317.818 |
| DALYs      | China | Female | Schizophrenia | 47.5 | 45 to 49 | 318.821 | 317.522 | 320.126 |
| DALYs      | China | Female | Schizophrenia | 52.5 | 50 to 54 | 317.840 | 316.533 | 319.153 |
| DALYs      | China | Female | Schizophrenia | 57.5 | 55 to 59 | 313.908 | 312.577 | 315.245 |
| DALYs      | China | Female | Schizophrenia | 62.5 | 60 to 64 | 303.849 | 302.393 | 305.312 |

|       |       |        |               |      |          |         |         |         |
|-------|-------|--------|---------------|------|----------|---------|---------|---------|
| DALYs | China | Female | Schizophrenia | 67.5 | 65 to 69 | 275.918 | 274.470 | 277.373 |
| DALYs | China | Female | Schizophrenia | 72.5 | 70 to 74 | 233.894 | 232.524 | 235.272 |
| DALYs | China | Female | Schizophrenia | 77.5 | 75 to 79 | 183.263 | 182.016 | 184.519 |
| DALYs | China | Both   | Schizophrenia | 12.5 | 10 to 14 | 7.678   | 7.505   | 7.856   |
| DALYs | China | Both   | Schizophrenia | 17.5 | 15 to 19 | 56.278  | 55.775  | 56.785  |
| DALYs | China | Both   | Schizophrenia | 22.5 | 20 to 24 | 175.144 | 174.148 | 176.146 |
| DALYs | China | Both   | Schizophrenia | 27.5 | 25 to 29 | 273.105 | 271.828 | 274.388 |
| DALYs | China | Both   | Schizophrenia | 32.5 | 30 to 34 | 322.141 | 320.916 | 323.371 |
| DALYs | China | Both   | Schizophrenia | 37.5 | 35 to 39 | 342.916 | 341.729 | 344.107 |
| DALYs | China | Both   | Schizophrenia | 42.5 | 40 to 44 | 345.262 | 344.108 | 346.419 |
| DALYs | China | Both   | Schizophrenia | 47.5 | 45 to 49 | 343.150 | 342.007 | 344.297 |
| DALYs | China | Both   | Schizophrenia | 52.5 | 50 to 54 | 339.328 | 338.180 | 340.480 |
| DALYs | China | Both   | Schizophrenia | 57.5 | 55 to 59 | 333.356 | 332.188 | 334.529 |
| DALYs | China | Both   | Schizophrenia | 62.5 | 60 to 64 | 320.966 | 319.690 | 322.247 |
| DALYs | China | Both   | Schizophrenia | 67.5 | 65 to 69 | 288.845 | 287.579 | 290.117 |
| DALYs | China | Both   | Schizophrenia | 72.5 | 70 to 74 | 241.650 | 240.453 | 242.852 |
| DALYs | China | Both   | Schizophrenia | 77.5 | 75 to 79 | 186.039 | 184.950 | 187.134 |

**Supplementary Table S9. Period effects (Rate Ratios) on schizophrenia incidence, prevalence, and DALYs rates in China estimated by the APC model, 2023–2052**

| measure    | location | sex    | cause         | Period | label        | Rate Ratio | CI <sub>Lo</sub> | CI <sub>Hi</sub> |
|------------|----------|--------|---------------|--------|--------------|------------|------------------|------------------|
| Incidence  | China    | Male   | Schizophrenia | 2025.5 | 2023 to 2027 | 1.005      | 1.002            | 1.009            |
| Incidence  | China    | Male   | Schizophrenia | 2030.5 | 2028 to 2032 | 1.004      | 1.001            | 1.008            |
| Incidence  | China    | Male   | Schizophrenia | 2035.5 | 2033 to 2037 | 1.000      | 1.000            | 1.000            |
| Incidence  | China    | Male   | Schizophrenia | 2040.5 | 2038 to 2042 | 0.999      | 0.995            | 1.003            |
| Incidence  | China    | Male   | Schizophrenia | 2045.5 | 2043 to 2047 | 1.002      | 0.998            | 1.006            |
| Incidence  | China    | Male   | Schizophrenia | 2050.5 | 2048 to 2052 | 1.011      | 1.007            | 1.015            |
| Incidence  | China    | Female | Schizophrenia | 2025.5 | 2023 to 2027 | 0.989      | 0.985            | 0.994            |
| Incidence  | China    | Female | Schizophrenia | 2030.5 | 2028 to 2032 | 0.998      | 0.993            | 1.003            |
| Incidence  | China    | Female | Schizophrenia | 2035.5 | 2033 to 2037 | 1.000      | 1.000            | 1.000            |
| Incidence  | China    | Female | Schizophrenia | 2040.5 | 2038 to 2042 | 1.006      | 1.001            | 1.011            |
| Incidence  | China    | Female | Schizophrenia | 2045.5 | 2043 to 2047 | 1.016      | 1.011            | 1.021            |
| Incidence  | China    | Female | Schizophrenia | 2050.5 | 2048 to 2052 | 1.032      | 1.026            | 1.038            |
| Incidence  | China    | Both   | Schizophrenia | 2025.5 | 2023 to 2027 | 0.998      | 0.993            | 1.002            |
| Incidence  | China    | Both   | Schizophrenia | 2030.5 | 2028 to 2032 | 1.001      | 0.997            | 1.005            |
| Incidence  | China    | Both   | Schizophrenia | 2035.5 | 2033 to 2037 | 1.000      | 1.000            | 1.000            |
| Incidence  | China    | Both   | Schizophrenia | 2040.5 | 2038 to 2042 | 1.002      | 0.998            | 1.007            |
| Incidence  | China    | Both   | Schizophrenia | 2045.5 | 2043 to 2047 | 1.009      | 1.004            | 1.013            |
| Incidence  | China    | Both   | Schizophrenia | 2050.5 | 2048 to 2052 | 1.021      | 1.017            | 1.026            |
| Prevalence | China    | Male   | Schizophrenia | 2025.5 | 2023 to 2027 | 1.011      | 1.008            | 1.013            |
| Prevalence | China    | Male   | Schizophrenia | 2030.5 | 2028 to 2032 | 1.008      | 1.005            | 1.010            |
| Prevalence | China    | Male   | Schizophrenia | 2035.5 | 2033 to 2037 | 1.000      | 1.000            | 1.000            |
| Prevalence | China    | Male   | Schizophrenia | 2040.5 | 2038 to 2042 | 0.994      | 0.992            | 0.997            |
| Prevalence | China    | Male   | Schizophrenia | 2045.5 | 2043 to 2047 | 0.991      | 0.989            | 0.994            |
| Prevalence | China    | Male   | Schizophrenia | 2050.5 | 2048 to 2052 | 0.992      | 0.990            | 0.995            |
| Prevalence | China    | Female | Schizophrenia | 2025.5 | 2023 to 2027 | 0.997      | 0.993            | 1.000            |
| Prevalence | China    | Female | Schizophrenia | 2030.5 | 2028 to 2032 | 1.003      | 0.999            | 1.006            |
| Prevalence | China    | Female | Schizophrenia | 2035.5 | 2033 to 2037 | 1.000      | 1.000            | 1.000            |
| Prevalence | China    | Female | Schizophrenia | 2040.5 | 2038 to 2042 | 0.999      | 0.996            | 1.003            |
| Prevalence | China    | Female | Schizophrenia | 2045.5 | 2043 to 2047 | 1.001      | 0.998            | 1.005            |
| Prevalence | China    | Female | Schizophrenia | 2050.5 | 2048 to 2052 | 1.007      | 1.004            | 1.011            |
| Prevalence | China    | Both   | Schizophrenia | 2025.5 | 2023 to 2027 | 1.004      | 1.001            | 1.006            |
| Prevalence | China    | Both   | Schizophrenia | 2030.5 | 2028 to 2032 | 1.005      | 1.002            | 1.008            |
| Prevalence | China    | Both   | Schizophrenia | 2035.5 | 2033 to 2037 | 1.000      | 1.000            | 1.000            |
| Prevalence | China    | Both   | Schizophrenia | 2040.5 | 2038 to 2042 | 0.997      | 0.994            | 1.000            |
| Prevalence | China    | Both   | Schizophrenia | 2045.5 | 2043 to 2047 | 0.997      | 0.994            | 1.000            |
| Prevalence | China    | Both   | Schizophrenia | 2050.5 | 2048 to 2052 | 1.000      | 0.997            | 1.004            |
| DALYs      | China    | Male   | Schizophrenia | 2025.5 | 2023 to 2027 | 1.012      | 1.009            | 1.014            |
| DALYs      | China    | Male   | Schizophrenia | 2030.5 | 2028 to 2032 | 1.008      | 1.006            | 1.010            |
| DALYs      | China    | Male   | Schizophrenia | 2035.5 | 2033 to 2037 | 1.000      | 1.000            | 1.000            |
| DALYs      | China    | Male   | Schizophrenia | 2040.5 | 2038 to 2042 | 0.994      | 0.992            | 0.996            |
| DALYs      | China    | Male   | Schizophrenia | 2045.5 | 2043 to 2047 | 0.991      | 0.989            | 0.994            |
| DALYs      | China    | Male   | Schizophrenia | 2050.5 | 2048 to 2052 | 0.992      | 0.990            | 0.995            |
| DALYs      | China    | Female | Schizophrenia | 2025.5 | 2023 to 2027 | 1.005      | 1.001            | 1.008            |
| DALYs      | China    | Female | Schizophrenia | 2030.5 | 2028 to 2032 | 1.007      | 1.004            | 1.010            |
| DALYs      | China    | Female | Schizophrenia | 2035.5 | 2033 to 2037 | 1.000      | 1.000            | 1.000            |
| DALYs      | China    | Female | Schizophrenia | 2040.5 | 2038 to 2042 | 0.995      | 0.992            | 0.999            |
| DALYs      | China    | Female | Schizophrenia | 2045.5 | 2043 to 2047 | 0.994      | 0.990            | 0.997            |
| DALYs      | China    | Female | Schizophrenia | 2050.5 | 2048 to 2052 | 0.996      | 0.992            | 1.000            |
| DALYs      | China    | Both   | Schizophrenia | 2025.5 | 2023 to 2027 | 1.007      | 1.005            | 1.010            |
| DALYs      | China    | Both   | Schizophrenia | 2030.5 | 2028 to 2032 | 1.007      | 1.004            | 1.010            |
| DALYs      | China    | Both   | Schizophrenia | 2035.5 | 2033 to 2037 | 1.000      | 1.000            | 1.000            |
| DALYs      | China    | Both   | Schizophrenia | 2040.5 | 2038 to 2042 | 0.995      | 0.992            | 0.998            |

|       |       |      |               |        |              |       |       |       |
|-------|-------|------|---------------|--------|--------------|-------|-------|-------|
| DALYs | China | Both | Schizophrenia | 2045.5 | 2043 to 2047 | 0.993 | 0.990 | 0.996 |
| DALYs | China | Both | Schizophrenia | 2050.5 | 2048 to 2052 | 0.996 | 0.993 | 0.999 |

**Supplementary Table S10. Cohort effects (Rate Ratios) on schizophrenia incidence, prevalence, and DALYs rates in China estimated by the APC model, 2023–2052**

| measure   | location | sex    | cause         | Cohort | label        | Rate Ratio | CI <sub>Lo</sub> | CI <sub>Hi</sub> |
|-----------|----------|--------|---------------|--------|--------------|------------|------------------|------------------|
| Incidence | China    | Male   | Schizophrenia | 1948   | 1946 to 1950 | 0.998      | 0.959            | 1.038            |
| Incidence | China    | Male   | Schizophrenia | 1953   | 1951 to 1955 | 1.000      | 0.983            | 1.017            |
| Incidence | China    | Male   | Schizophrenia | 1958   | 1956 to 1960 | 0.989      | 0.978            | 1.000            |
| Incidence | China    | Male   | Schizophrenia | 1963   | 1961 to 1965 | 0.990      | 0.982            | 0.998            |
| Incidence | China    | Male   | Schizophrenia | 1968   | 1966 to 1970 | 0.996      | 0.990            | 1.003            |
| Incidence | China    | Male   | Schizophrenia | 1973   | 1971 to 1975 | 1.004      | 0.998            | 1.010            |
| Incidence | China    | Male   | Schizophrenia | 1978   | 1976 to 1980 | 1.006      | 1.000            | 1.012            |
| Incidence | China    | Male   | Schizophrenia | 1983   | 1981 to 1985 | 1.009      | 1.004            | 1.015            |
| Incidence | China    | Male   | Schizophrenia | 1988   | 1986 to 1990 | 1.010      | 1.005            | 1.015            |
| Incidence | China    | Male   | Schizophrenia | 1993   | 1991 to 1995 | 1.000      | 1.000            | 1.000            |
| Incidence | China    | Male   | Schizophrenia | 1998   | 1996 to 2000 | 1.002      | 0.996            | 1.007            |
| Incidence | China    | Male   | Schizophrenia | 2003   | 2001 to 2005 | 1.007      | 1.002            | 1.013            |
| Incidence | China    | Male   | Schizophrenia | 2008   | 2006 to 2010 | 1.010      | 1.004            | 1.016            |
| Incidence | China    | Male   | Schizophrenia | 2013   | 2011 to 2015 | 1.005      | 0.999            | 1.011            |
| Incidence | China    | Male   | Schizophrenia | 2018   | 2016 to 2020 | 1.002      | 0.996            | 1.008            |
| Incidence | China    | Male   | Schizophrenia | 2023   | 2021 to 2025 | 1.001      | 0.994            | 1.009            |
| Incidence | China    | Male   | Schizophrenia | 2028   | 2026 to 2030 | 1.002      | 0.994            | 1.011            |
| Incidence | China    | Male   | Schizophrenia | 2033   | 2031 to 2035 | 1.003      | 0.991            | 1.015            |
| Incidence | China    | Male   | Schizophrenia | 2038   | 2036 to 2040 | 1.005      | 0.979            | 1.032            |
| Incidence | China    | Female | Schizophrenia | 1948   | 1946 to 1950 | 0.924      | 0.877            | 0.974            |
| Incidence | China    | Female | Schizophrenia | 1953   | 1951 to 1955 | 0.935      | 0.914            | 0.957            |
| Incidence | China    | Female | Schizophrenia | 1958   | 1956 to 1960 | 0.934      | 0.919            | 0.948            |
| Incidence | China    | Female | Schizophrenia | 1963   | 1961 to 1965 | 0.942      | 0.931            | 0.953            |
| Incidence | China    | Female | Schizophrenia | 1968   | 1966 to 1970 | 0.952      | 0.943            | 0.960            |
| Incidence | China    | Female | Schizophrenia | 1973   | 1971 to 1975 | 0.966      | 0.958            | 0.974            |
| Incidence | China    | Female | Schizophrenia | 1978   | 1976 to 1980 | 0.981      | 0.974            | 0.989            |
| Incidence | China    | Female | Schizophrenia | 1983   | 1981 to 1985 | 0.996      | 0.989            | 1.003            |
| Incidence | China    | Female | Schizophrenia | 1988   | 1986 to 1990 | 1.005      | 0.998            | 1.012            |
| Incidence | China    | Female | Schizophrenia | 1993   | 1991 to 1995 | 1.000      | 1.000            | 1.000            |
| Incidence | China    | Female | Schizophrenia | 1998   | 1996 to 2000 | 1.005      | 0.998            | 1.012            |
| Incidence | China    | Female | Schizophrenia | 2003   | 2001 to 2005 | 1.018      | 1.010            | 1.026            |
| Incidence | China    | Female | Schizophrenia | 2008   | 2006 to 2010 | 1.029      | 1.020            | 1.037            |
| Incidence | China    | Female | Schizophrenia | 2013   | 2011 to 2015 | 1.029      | 1.020            | 1.038            |
| Incidence | China    | Female | Schizophrenia | 2018   | 2016 to 2020 | 1.032      | 1.023            | 1.042            |
| Incidence | China    | Female | Schizophrenia | 2023   | 2021 to 2025 | 1.038      | 1.027            | 1.048            |
| Incidence | China    | Female | Schizophrenia | 2028   | 2026 to 2030 | 1.044      | 1.031            | 1.057            |
| Incidence | China    | Female | Schizophrenia | 2033   | 2031 to 2035 | 1.050      | 1.032            | 1.069            |
| Incidence | China    | Female | Schizophrenia | 2038   | 2036 to 2040 | 1.059      | 1.020            | 1.099            |
| Incidence | China    | Both   | Schizophrenia | 1948   | 1946 to 1950 | 0.965      | 0.922            | 1.010            |
| Incidence | China    | Both   | Schizophrenia | 1953   | 1951 to 1955 | 0.971      | 0.952            | 0.990            |
| Incidence | China    | Both   | Schizophrenia | 1958   | 1956 to 1960 | 0.965      | 0.952            | 0.977            |
| Incidence | China    | Both   | Schizophrenia | 1963   | 1961 to 1965 | 0.968      | 0.959            | 0.977            |
| Incidence | China    | Both   | Schizophrenia | 1968   | 1966 to 1970 | 0.976      | 0.969            | 0.984            |
| Incidence | China    | Both   | Schizophrenia | 1973   | 1971 to 1975 | 0.987      | 0.980            | 0.994            |
| Incidence | China    | Both   | Schizophrenia | 1978   | 1976 to 1980 | 0.995      | 0.988            | 1.001            |
| Incidence | China    | Both   | Schizophrenia | 1983   | 1981 to 1985 | 1.003      | 0.997            | 1.009            |
| Incidence | China    | Both   | Schizophrenia | 1988   | 1986 to 1990 | 1.007      | 1.001            | 1.012            |
| Incidence | China    | Both   | Schizophrenia | 1993   | 1991 to 1995 | 1.000      | 1.000            | 1.000            |
| Incidence | China    | Both   | Schizophrenia | 1998   | 1996 to 2000 | 1.005      | 0.999            | 1.012            |
| Incidence | China    | Both   | Schizophrenia | 2003   | 2001 to 2005 | 1.017      | 1.010            | 1.023            |
| Incidence | China    | Both   | Schizophrenia | 2008   | 2006 to 2010 | 1.024      | 1.017            | 1.030            |

|            |       |        |               |      |              |       |       |       |
|------------|-------|--------|---------------|------|--------------|-------|-------|-------|
| Incidence  | China | Both   | Schizophrenia | 2013 | 2011 to 2015 | 1.020 | 1.013 | 1.028 |
| Incidence  | China | Both   | Schizophrenia | 2018 | 2016 to 2020 | 1.019 | 1.012 | 1.027 |
| Incidence  | China | Both   | Schizophrenia | 2023 | 2021 to 2025 | 1.021 | 1.013 | 1.030 |
| Incidence  | China | Both   | Schizophrenia | 2028 | 2026 to 2030 | 1.024 | 1.014 | 1.035 |
| Incidence  | China | Both   | Schizophrenia | 2033 | 2031 to 2035 | 1.027 | 1.013 | 1.042 |
| Incidence  | China | Both   | Schizophrenia | 2038 | 2036 to 2040 | 1.033 | 1.001 | 1.065 |
| Prevalence | China | Male   | Schizophrenia | 1948 | 1946 to 1950 | 1.039 | 1.027 | 1.052 |
| Prevalence | China | Male   | Schizophrenia | 1953 | 1951 to 1955 | 1.038 | 1.030 | 1.045 |
| Prevalence | China | Male   | Schizophrenia | 1958 | 1956 to 1960 | 1.029 | 1.023 | 1.034 |
| Prevalence | China | Male   | Schizophrenia | 1963 | 1961 to 1965 | 1.028 | 1.023 | 1.033 |
| Prevalence | China | Male   | Schizophrenia | 1968 | 1966 to 1970 | 1.027 | 1.023 | 1.031 |
| Prevalence | China | Male   | Schizophrenia | 1973 | 1971 to 1975 | 1.024 | 1.020 | 1.027 |
| Prevalence | China | Male   | Schizophrenia | 1978 | 1976 to 1980 | 1.020 | 1.017 | 1.023 |
| Prevalence | China | Male   | Schizophrenia | 1983 | 1981 to 1985 | 1.021 | 1.018 | 1.024 |
| Prevalence | China | Male   | Schizophrenia | 1988 | 1986 to 1990 | 1.016 | 1.013 | 1.019 |
| Prevalence | China | Male   | Schizophrenia | 1993 | 1991 to 1995 | 1.000 | 1.000 | 1.000 |
| Prevalence | China | Male   | Schizophrenia | 1998 | 1996 to 2000 | 0.999 | 0.996 | 1.002 |
| Prevalence | China | Male   | Schizophrenia | 2003 | 2001 to 2005 | 0.999 | 0.996 | 1.003 |
| Prevalence | China | Male   | Schizophrenia | 2008 | 2006 to 2010 | 0.995 | 0.991 | 0.999 |
| Prevalence | China | Male   | Schizophrenia | 2013 | 2011 to 2015 | 0.988 | 0.984 | 0.992 |
| Prevalence | China | Male   | Schizophrenia | 2018 | 2016 to 2020 | 0.983 | 0.978 | 0.988 |
| Prevalence | China | Male   | Schizophrenia | 2023 | 2021 to 2025 | 0.979 | 0.973 | 0.985 |
| Prevalence | China | Male   | Schizophrenia | 2028 | 2026 to 2030 | 0.975 | 0.965 | 0.984 |
| Prevalence | China | Male   | Schizophrenia | 2033 | 2031 to 2035 | 0.968 | 0.951 | 0.986 |
| Prevalence | China | Male   | Schizophrenia | 2038 | 2036 to 2040 | 0.964 | 0.914 | 1.018 |
| Prevalence | China | Female | Schizophrenia | 1948 | 1946 to 1950 | 0.981 | 0.967 | 0.996 |
| Prevalence | China | Female | Schizophrenia | 1953 | 1951 to 1955 | 0.986 | 0.977 | 0.995 |
| Prevalence | China | Female | Schizophrenia | 1958 | 1956 to 1960 | 0.986 | 0.978 | 0.993 |
| Prevalence | China | Female | Schizophrenia | 1963 | 1961 to 1965 | 0.991 | 0.985 | 0.997 |
| Prevalence | China | Female | Schizophrenia | 1968 | 1966 to 1970 | 0.995 | 0.990 | 1.000 |
| Prevalence | China | Female | Schizophrenia | 1973 | 1971 to 1975 | 1.000 | 0.995 | 1.005 |
| Prevalence | China | Female | Schizophrenia | 1978 | 1976 to 1980 | 1.007 | 1.003 | 1.012 |
| Prevalence | China | Female | Schizophrenia | 1983 | 1981 to 1985 | 1.017 | 1.012 | 1.021 |
| Prevalence | China | Female | Schizophrenia | 1988 | 1986 to 1990 | 1.016 | 1.012 | 1.020 |
| Prevalence | China | Female | Schizophrenia | 1993 | 1991 to 1995 | 1.000 | 1.000 | 1.000 |
| Prevalence | China | Female | Schizophrenia | 1998 | 1996 to 2000 | 1.001 | 0.997 | 1.006 |
| Prevalence | China | Female | Schizophrenia | 2003 | 2001 to 2005 | 1.010 | 1.005 | 1.015 |
| Prevalence | China | Female | Schizophrenia | 2008 | 2006 to 2010 | 1.013 | 1.007 | 1.018 |
| Prevalence | China | Female | Schizophrenia | 2013 | 2011 to 2015 | 1.011 | 1.005 | 1.017 |
| Prevalence | China | Female | Schizophrenia | 2018 | 2016 to 2020 | 1.012 | 1.004 | 1.019 |
| Prevalence | China | Female | Schizophrenia | 2023 | 2021 to 2025 | 1.012 | 1.002 | 1.021 |
| Prevalence | China | Female | Schizophrenia | 2028 | 2026 to 2030 | 1.011 | 0.997 | 1.026 |
| Prevalence | China | Female | Schizophrenia | 2033 | 2031 to 2035 | 1.009 | 0.982 | 1.038 |
| Prevalence | China | Female | Schizophrenia | 2038 | 2036 to 2040 | 1.010 | 0.931 | 1.095 |
| Prevalence | China | Both   | Schizophrenia | 1948 | 1946 to 1950 | 1.010 | 0.997 | 1.023 |
| Prevalence | China | Both   | Schizophrenia | 1953 | 1951 to 1955 | 1.012 | 1.004 | 1.020 |
| Prevalence | China | Both   | Schizophrenia | 1958 | 1956 to 1960 | 1.008 | 1.001 | 1.014 |
| Prevalence | China | Both   | Schizophrenia | 1963 | 1961 to 1965 | 1.010 | 1.005 | 1.015 |
| Prevalence | China | Both   | Schizophrenia | 1968 | 1966 to 1970 | 1.011 | 1.007 | 1.016 |
| Prevalence | China | Both   | Schizophrenia | 1973 | 1971 to 1975 | 1.013 | 1.008 | 1.017 |
| Prevalence | China | Both   | Schizophrenia | 1978 | 1976 to 1980 | 1.014 | 1.010 | 1.018 |
| Prevalence | China | Both   | Schizophrenia | 1983 | 1981 to 1985 | 1.019 | 1.015 | 1.023 |
| Prevalence | China | Both   | Schizophrenia | 1988 | 1986 to 1990 | 1.015 | 1.012 | 1.019 |
| Prevalence | China | Both   | Schizophrenia | 1993 | 1991 to 1995 | 1.000 | 1.000 | 1.000 |
| Prevalence | China | Both   | Schizophrenia | 1998 | 1996 to 2000 | 1.002 | 0.998 | 1.006 |
| Prevalence | China | Both   | Schizophrenia | 2003 | 2001 to 2005 | 1.008 | 1.004 | 1.013 |

|            |       |        |               |      |              |       |       |       |
|------------|-------|--------|---------------|------|--------------|-------|-------|-------|
| Prevalence | China | Both   | Schizophrenia | 2008 | 2006 to 2010 | 1.008 | 1.003 | 1.012 |
| Prevalence | China | Both   | Schizophrenia | 2013 | 2011 to 2015 | 1.003 | 0.998 | 1.008 |
| Prevalence | China | Both   | Schizophrenia | 2018 | 2016 to 2020 | 1.000 | 0.994 | 1.006 |
| Prevalence | China | Both   | Schizophrenia | 2023 | 2021 to 2025 | 0.997 | 0.989 | 1.005 |
| Prevalence | China | Both   | Schizophrenia | 2028 | 2026 to 2030 | 0.995 | 0.983 | 1.006 |
| Prevalence | China | Both   | Schizophrenia | 2033 | 2031 to 2035 | 0.990 | 0.968 | 1.013 |
| Prevalence | China | Both   | Schizophrenia | 2038 | 2036 to 2040 | 0.988 | 0.926 | 1.055 |
| DALYs      | China | Male   | Schizophrenia | 1948 | 1946 to 1950 | 1.040 | 1.027 | 1.053 |
| DALYs      | China | Male   | Schizophrenia | 1953 | 1951 to 1955 | 1.038 | 1.031 | 1.046 |
| DALYs      | China | Male   | Schizophrenia | 1958 | 1956 to 1960 | 1.029 | 1.023 | 1.035 |
| DALYs      | China | Male   | Schizophrenia | 1963 | 1961 to 1965 | 1.028 | 1.023 | 1.033 |
| DALYs      | China | Male   | Schizophrenia | 1968 | 1966 to 1970 | 1.026 | 1.022 | 1.030 |
| DALYs      | China | Male   | Schizophrenia | 1973 | 1971 to 1975 | 1.023 | 1.019 | 1.026 |
| DALYs      | China | Male   | Schizophrenia | 1978 | 1976 to 1980 | 1.019 | 1.016 | 1.023 |
| DALYs      | China | Male   | Schizophrenia | 1983 | 1981 to 1985 | 1.020 | 1.017 | 1.024 |
| DALYs      | China | Male   | Schizophrenia | 1988 | 1986 to 1990 | 1.016 | 1.013 | 1.019 |
| DALYs      | China | Male   | Schizophrenia | 1993 | 1991 to 1995 | 1.000 | 1.000 | 1.000 |
| DALYs      | China | Male   | Schizophrenia | 1998 | 1996 to 2000 | 1.000 | 0.997 | 1.003 |
| DALYs      | China | Male   | Schizophrenia | 2003 | 2001 to 2005 | 1.001 | 0.997 | 1.004 |
| DALYs      | China | Male   | Schizophrenia | 2008 | 2006 to 2010 | 0.995 | 0.991 | 0.999 |
| DALYs      | China | Male   | Schizophrenia | 2013 | 2011 to 2015 | 0.987 | 0.983 | 0.991 |
| DALYs      | China | Male   | Schizophrenia | 2018 | 2016 to 2020 | 0.982 | 0.977 | 0.986 |
| DALYs      | China | Male   | Schizophrenia | 2023 | 2021 to 2025 | 0.977 | 0.971 | 0.983 |
| DALYs      | China | Male   | Schizophrenia | 2028 | 2026 to 2030 | 0.972 | 0.963 | 0.981 |
| DALYs      | China | Male   | Schizophrenia | 2033 | 2031 to 2035 | 0.966 | 0.949 | 0.983 |
| DALYs      | China | Male   | Schizophrenia | 2038 | 2036 to 2040 | 0.961 | 0.913 | 1.012 |
| DALYs      | China | Female | Schizophrenia | 1948 | 1946 to 1950 | 1.014 | 0.998 | 1.030 |
| DALYs      | China | Female | Schizophrenia | 1953 | 1951 to 1955 | 1.015 | 1.006 | 1.025 |
| DALYs      | China | Female | Schizophrenia | 1958 | 1956 to 1960 | 1.011 | 1.003 | 1.019 |
| DALYs      | China | Female | Schizophrenia | 1963 | 1961 to 1965 | 1.013 | 1.006 | 1.019 |
| DALYs      | China | Female | Schizophrenia | 1968 | 1966 to 1970 | 1.013 | 1.007 | 1.018 |
| DALYs      | China | Female | Schizophrenia | 1973 | 1971 to 1975 | 1.015 | 1.010 | 1.020 |
| DALYs      | China | Female | Schizophrenia | 1978 | 1976 to 1980 | 1.019 | 1.015 | 1.024 |
| DALYs      | China | Female | Schizophrenia | 1983 | 1981 to 1985 | 1.025 | 1.020 | 1.029 |
| DALYs      | China | Female | Schizophrenia | 1988 | 1986 to 1990 | 1.020 | 1.015 | 1.024 |
| DALYs      | China | Female | Schizophrenia | 1993 | 1991 to 1995 | 1.000 | 1.000 | 1.000 |
| DALYs      | China | Female | Schizophrenia | 1998 | 1996 to 2000 | 0.998 | 0.994 | 1.003 |
| DALYs      | China | Female | Schizophrenia | 2003 | 2001 to 2005 | 1.005 | 0.999 | 1.010 |
| DALYs      | China | Female | Schizophrenia | 2008 | 2006 to 2010 | 1.004 | 0.998 | 1.009 |
| DALYs      | China | Female | Schizophrenia | 2013 | 2011 to 2015 | 0.996 | 0.990 | 1.003 |
| DALYs      | China | Female | Schizophrenia | 2018 | 2016 to 2020 | 0.991 | 0.984 | 0.998 |
| DALYs      | China | Female | Schizophrenia | 2023 | 2021 to 2025 | 0.985 | 0.976 | 0.995 |
| DALYs      | China | Female | Schizophrenia | 2028 | 2026 to 2030 | 0.980 | 0.966 | 0.994 |
| DALYs      | China | Female | Schizophrenia | 2033 | 2031 to 2035 | 0.972 | 0.946 | 0.999 |
| DALYs      | China | Female | Schizophrenia | 2038 | 2036 to 2040 | 0.967 | 0.894 | 1.046 |
| DALYs      | China | Both   | Schizophrenia | 1948 | 1946 to 1950 | 1.027 | 1.013 | 1.042 |
| DALYs      | China | Both   | Schizophrenia | 1953 | 1951 to 1955 | 1.027 | 1.019 | 1.036 |
| DALYs      | China | Both   | Schizophrenia | 1958 | 1956 to 1960 | 1.021 | 1.014 | 1.027 |
| DALYs      | China | Both   | Schizophrenia | 1963 | 1961 to 1965 | 1.020 | 1.015 | 1.026 |
| DALYs      | China | Both   | Schizophrenia | 1968 | 1966 to 1970 | 1.020 | 1.015 | 1.024 |
| DALYs      | China | Both   | Schizophrenia | 1973 | 1971 to 1975 | 1.019 | 1.015 | 1.024 |
| DALYs      | China | Both   | Schizophrenia | 1978 | 1976 to 1980 | 1.019 | 1.015 | 1.023 |
| DALYs      | China | Both   | Schizophrenia | 1983 | 1981 to 1985 | 1.022 | 1.019 | 1.026 |
| DALYs      | China | Both   | Schizophrenia | 1988 | 1986 to 1990 | 1.017 | 1.013 | 1.020 |
| DALYs      | China | Both   | Schizophrenia | 1993 | 1991 to 1995 | 1.000 | 1.000 | 1.000 |
| DALYs      | China | Both   | Schizophrenia | 1998 | 1996 to 2000 | 1.002 | 0.998 | 1.006 |

|       |       |      |               |      |              |       |       |       |
|-------|-------|------|---------------|------|--------------|-------|-------|-------|
| DALYs | China | Both | Schizophrenia | 2003 | 2001 to 2005 | 1.007 | 1.003 | 1.011 |
| DALYs | China | Both | Schizophrenia | 2008 | 2006 to 2010 | 1.005 | 1.000 | 1.009 |
| DALYs | China | Both | Schizophrenia | 2013 | 2011 to 2015 | 0.997 | 0.992 | 1.002 |
| DALYs | China | Both | Schizophrenia | 2018 | 2016 to 2020 | 0.991 | 0.985 | 0.996 |
| DALYs | China | Both | Schizophrenia | 2023 | 2021 to 2025 | 0.985 | 0.978 | 0.993 |
| DALYs | China | Both | Schizophrenia | 2028 | 2026 to 2030 | 0.980 | 0.970 | 0.991 |
| DALYs | China | Both | Schizophrenia | 2033 | 2031 to 2035 | 0.974 | 0.953 | 0.995 |
| DALYs | China | Both | Schizophrenia | 2038 | 2036 to 2040 | 0.969 | 0.911 | 1.031 |

**Supplementary Table S11. Estimated annual percentage change (local and net drift) in schizophrenia incidence, prevalence, and DALYs rates by sex and age in China, 2023–2052**

| measure    | location | sex    | cause         | Drift (%/yr) | CI Lo  | CI Hi  |
|------------|----------|--------|---------------|--------------|--------|--------|
| Incidence  | China    | Male   | Schizophrenia | 0.010        | -0.003 | 0.024  |
| Incidence  | China    | Female | Schizophrenia | 0.155        | 0.136  | 0.173  |
| Incidence  | China    | Both   | Schizophrenia | 0.082        | 0.066  | 0.098  |
| Prevalence | China    | Male   | Schizophrenia | -0.085       | -0.096 | -0.074 |
| Prevalence | China    | Female | Schizophrenia | 0.028        | 0.012  | 0.044  |
| Prevalence | China    | Both   | Schizophrenia | -0.025       | -0.037 | -0.012 |
| DALYs      | China    | Male   | Schizophrenia | -0.087       | -0.097 | -0.077 |
| DALYs      | China    | Female | Schizophrenia | -0.051       | -0.066 | -0.035 |
| DALYs      | China    | Both   | Schizophrenia | -0.060       | -0.073 | -0.048 |

| measure   | location | sex    | cause         | Age  | label    | ent per | CI Lo  | CI Hi  |
|-----------|----------|--------|---------------|------|----------|---------|--------|--------|
| Incidence | China    | Male   | Schizophrenia | 12.5 | 10 to 14 | 0.003   | -0.075 | 0.080  |
| Incidence | China    | Male   | Schizophrenia | 17.5 | 15 to 19 | -0.026  | -0.061 | 0.010  |
| Incidence | China    | Male   | Schizophrenia | 22.5 | 20 to 24 | -0.031  | -0.056 | -0.005 |
| Incidence | China    | Male   | Schizophrenia | 27.5 | 25 to 29 | -0.012  | -0.035 | 0.011  |
| Incidence | China    | Male   | Schizophrenia | 32.5 | 30 to 34 | 0.013   | -0.010 | 0.035  |
| Incidence | China    | Male   | Schizophrenia | 37.5 | 35 to 39 | 0.006   | -0.017 | 0.029  |
| Incidence | China    | Male   | Schizophrenia | 42.5 | 40 to 44 | -0.002  | -0.026 | 0.022  |
| Incidence | China    | Male   | Schizophrenia | 47.5 | 45 to 49 | -0.015  | -0.039 | 0.009  |
| Incidence | China    | Male   | Schizophrenia | 52.5 | 50 to 54 | -0.016  | -0.039 | 0.007  |
| Incidence | China    | Male   | Schizophrenia | 57.5 | 55 to 59 | 0.022   | 0.000  | 0.045  |
| Incidence | China    | Male   | Schizophrenia | 62.5 | 60 to 64 | 0.080   | 0.054  | 0.106  |
| Incidence | China    | Male   | Schizophrenia | 67.5 | 65 to 69 | 0.090   | 0.054  | 0.125  |
| Incidence | China    | Male   | Schizophrenia | 72.5 | 70 to 74 | 0.047   | -0.006 | 0.101  |
| Incidence | China    | Male   | Schizophrenia | 77.5 | 75 to 79 | 0.013   | -0.106 | 0.132  |
| Incidence | China    | Female | Schizophrenia | 12.5 | 10 to 14 | 0.116   | 0.005  | 0.227  |
| Incidence | China    | Female | Schizophrenia | 17.5 | 15 to 19 | 0.087   | 0.034  | 0.140  |
| Incidence | China    | Female | Schizophrenia | 22.5 | 20 to 24 | 0.088   | 0.050  | 0.126  |
| Incidence | China    | Female | Schizophrenia | 27.5 | 25 to 29 | 0.114   | 0.080  | 0.149  |
| Incidence | China    | Female | Schizophrenia | 32.5 | 30 to 34 | 0.137   | 0.104  | 0.170  |
| Incidence | China    | Female | Schizophrenia | 37.5 | 35 to 39 | 0.125   | 0.091  | 0.158  |
| Incidence | China    | Female | Schizophrenia | 42.5 | 40 to 44 | 0.117   | 0.084  | 0.151  |
| Incidence | China    | Female | Schizophrenia | 47.5 | 45 to 49 | 0.118   | 0.085  | 0.151  |
| Incidence | China    | Female | Schizophrenia | 52.5 | 50 to 54 | 0.151   | 0.118  | 0.183  |
| Incidence | China    | Female | Schizophrenia | 57.5 | 55 to 59 | 0.218   | 0.187  | 0.250  |
| Incidence | China    | Female | Schizophrenia | 62.5 | 60 to 64 | 0.273   | 0.237  | 0.309  |
| Incidence | China    | Female | Schizophrenia | 67.5 | 65 to 69 | 0.265   | 0.216  | 0.314  |
| Incidence | China    | Female | Schizophrenia | 72.5 | 70 to 74 | 0.203   | 0.131  | 0.275  |
| Incidence | China    | Female | Schizophrenia | 77.5 | 75 to 79 | 0.163   | 0.006  | 0.320  |
| Incidence | China    | Both   | Schizophrenia | 12.5 | 10 to 14 | 0.049   | -0.042 | 0.141  |
| Incidence | China    | Both   | Schizophrenia | 17.5 | 15 to 19 | 0.018   | -0.025 | 0.061  |
| Incidence | China    | Both   | Schizophrenia | 22.5 | 20 to 24 | 0.017   | -0.014 | 0.048  |
| Incidence | China    | Both   | Schizophrenia | 27.5 | 25 to 29 | 0.047   | 0.020  | 0.075  |
| Incidence | China    | Both   | Schizophrenia | 32.5 | 30 to 34 | 0.084   | 0.057  | 0.111  |
| Incidence | China    | Both   | Schizophrenia | 37.5 | 35 to 39 | 0.085   | 0.057  | 0.112  |
| Incidence | China    | Both   | Schizophrenia | 42.5 | 40 to 44 | 0.077   | 0.049  | 0.105  |
| Incidence | China    | Both   | Schizophrenia | 47.5 | 45 to 49 | 0.062   | 0.034  | 0.090  |
| Incidence | China    | Both   | Schizophrenia | 52.5 | 50 to 54 | 0.064   | 0.037  | 0.091  |
| Incidence | China    | Both   | Schizophrenia | 57.5 | 55 to 59 | 0.108   | 0.081  | 0.135  |
| Incidence | China    | Both   | Schizophrenia | 62.5 | 60 to 64 | 0.164   | 0.133  | 0.194  |

|            |       |        |               |      |          |        |        |        |
|------------|-------|--------|---------------|------|----------|--------|--------|--------|
| Incidence  | China | Both   | Schizophrenia | 67.5 | 65 to 69 | 0.166  | 0.125  | 0.207  |
| Incidence  | China | Both   | Schizophrenia | 72.5 | 70 to 74 | 0.114  | 0.053  | 0.176  |
| Incidence  | China | Both   | Schizophrenia | 77.5 | 75 to 79 | 0.076  | -0.060 | 0.212  |
| Prevalence | China | Male   | Schizophrenia | 12.5 | 10 to 14 | -0.098 | -0.257 | 0.062  |
| Prevalence | China | Male   | Schizophrenia | 17.5 | 15 to 19 | -0.103 | -0.159 | -0.047 |
| Prevalence | China | Male   | Schizophrenia | 22.5 | 20 to 24 | -0.103 | -0.132 | -0.073 |
| Prevalence | China | Male   | Schizophrenia | 27.5 | 25 to 29 | -0.089 | -0.110 | -0.069 |
| Prevalence | China | Male   | Schizophrenia | 32.5 | 30 to 34 | -0.070 | -0.086 | -0.053 |
| Prevalence | China | Male   | Schizophrenia | 37.5 | 35 to 39 | -0.087 | -0.102 | -0.072 |
| Prevalence | China | Male   | Schizophrenia | 42.5 | 40 to 44 | -0.103 | -0.118 | -0.089 |
| Prevalence | China | Male   | Schizophrenia | 47.5 | 45 to 49 | -0.105 | -0.120 | -0.091 |
| Prevalence | China | Male   | Schizophrenia | 52.5 | 50 to 54 | -0.107 | -0.121 | -0.094 |
| Prevalence | China | Male   | Schizophrenia | 57.5 | 55 to 59 | -0.088 | -0.101 | -0.074 |
| Prevalence | China | Male   | Schizophrenia | 62.5 | 60 to 64 | -0.046 | -0.060 | -0.031 |
| Prevalence | China | Male   | Schizophrenia | 67.5 | 65 to 69 | -0.036 | -0.054 | -0.019 |
| Prevalence | China | Male   | Schizophrenia | 72.5 | 70 to 74 | -0.058 | -0.081 | -0.036 |
| Prevalence | China | Male   | Schizophrenia | 77.5 | 75 to 79 | -0.062 | -0.098 | -0.026 |
| Prevalence | China | Female | Schizophrenia | 12.5 | 10 to 14 | -0.008 | -0.247 | 0.232  |
| Prevalence | China | Female | Schizophrenia | 17.5 | 15 to 19 | -0.009 | -0.094 | 0.077  |
| Prevalence | China | Female | Schizophrenia | 22.5 | 20 to 24 | 0.001  | -0.044 | 0.047  |
| Prevalence | China | Female | Schizophrenia | 27.5 | 25 to 29 | 0.031  | -0.001 | 0.063  |
| Prevalence | China | Female | Schizophrenia | 32.5 | 30 to 34 | 0.051  | 0.026  | 0.077  |
| Prevalence | China | Female | Schizophrenia | 37.5 | 35 to 39 | 0.013  | -0.010 | 0.035  |
| Prevalence | China | Female | Schizophrenia | 42.5 | 40 to 44 | -0.021 | -0.042 | 0.001  |
| Prevalence | China | Female | Schizophrenia | 47.5 | 45 to 49 | -0.027 | -0.048 | -0.007 |
| Prevalence | China | Female | Schizophrenia | 52.5 | 50 to 54 | -0.010 | -0.029 | 0.010  |
| Prevalence | China | Female | Schizophrenia | 57.5 | 55 to 59 | 0.046  | 0.028  | 0.065  |
| Prevalence | China | Female | Schizophrenia | 62.5 | 60 to 64 | 0.112  | 0.092  | 0.131  |
| Prevalence | China | Female | Schizophrenia | 67.5 | 65 to 69 | 0.120  | 0.097  | 0.142  |
| Prevalence | China | Female | Schizophrenia | 72.5 | 70 to 74 | 0.088  | 0.059  | 0.116  |
| Prevalence | China | Female | Schizophrenia | 77.5 | 75 to 79 | 0.073  | 0.028  | 0.119  |
| Prevalence | China | Both   | Schizophrenia | 12.5 | 10 to 14 | -0.060 | -0.253 | 0.133  |
| Prevalence | China | Both   | Schizophrenia | 17.5 | 15 to 19 | -0.066 | -0.134 | 0.002  |
| Prevalence | China | Both   | Schizophrenia | 22.5 | 20 to 24 | -0.060 | -0.096 | -0.024 |
| Prevalence | China | Both   | Schizophrenia | 27.5 | 25 to 29 | -0.032 | -0.057 | -0.007 |
| Prevalence | China | Both   | Schizophrenia | 32.5 | 30 to 34 | 0.000  | -0.020 | 0.021  |
| Prevalence | China | Both   | Schizophrenia | 37.5 | 35 to 39 | -0.018 | -0.037 | 0.000  |
| Prevalence | China | Both   | Schizophrenia | 42.5 | 40 to 44 | -0.042 | -0.060 | -0.025 |
| Prevalence | China | Both   | Schizophrenia | 47.5 | 45 to 49 | -0.054 | -0.071 | -0.037 |
| Prevalence | China | Both   | Schizophrenia | 52.5 | 50 to 54 | -0.056 | -0.072 | -0.040 |
| Prevalence | China | Both   | Schizophrenia | 57.5 | 55 to 59 | -0.025 | -0.040 | -0.009 |
| Prevalence | China | Both   | Schizophrenia | 62.5 | 60 to 64 | 0.029  | 0.012  | 0.045  |
| Prevalence | China | Both   | Schizophrenia | 67.5 | 65 to 69 | 0.040  | 0.020  | 0.059  |
| Prevalence | China | Both   | Schizophrenia | 72.5 | 70 to 74 | 0.015  | -0.010 | 0.040  |
| Prevalence | China | Both   | Schizophrenia | 77.5 | 75 to 79 | 0.008  | -0.032 | 0.048  |
| DALYs      | China | Male   | Schizophrenia | 12.5 | 10 to 14 | -0.107 | -0.260 | 0.045  |
| DALYs      | China | Male   | Schizophrenia | 17.5 | 15 to 19 | -0.115 | -0.170 | -0.061 |
| DALYs      | China | Male   | Schizophrenia | 22.5 | 20 to 24 | -0.118 | -0.147 | -0.089 |
| DALYs      | China | Male   | Schizophrenia | 27.5 | 25 to 29 | -0.105 | -0.125 | -0.085 |
| DALYs      | China | Male   | Schizophrenia | 32.5 | 30 to 34 | -0.079 | -0.095 | -0.062 |
| DALYs      | China | Male   | Schizophrenia | 37.5 | 35 to 39 | -0.090 | -0.105 | -0.075 |
| DALYs      | China | Male   | Schizophrenia | 42.5 | 40 to 44 | -0.098 | -0.112 | -0.084 |
| DALYs      | China | Male   | Schizophrenia | 47.5 | 45 to 49 | -0.096 | -0.110 | -0.082 |
| DALYs      | China | Male   | Schizophrenia | 52.5 | 50 to 54 | -0.099 | -0.113 | -0.085 |
| DALYs      | China | Male   | Schizophrenia | 57.5 | 55 to 59 | -0.085 | -0.099 | -0.071 |
| DALYs      | China | Male   | Schizophrenia | 62.5 | 60 to 64 | -0.045 | -0.060 | -0.031 |

|       |       |        |               |      |          |        |        |        |
|-------|-------|--------|---------------|------|----------|--------|--------|--------|
| DALYs | China | Male   | Schizophrenia | 67.5 | 65 to 69 | -0.040 | -0.058 | -0.022 |
| DALYs | China | Male   | Schizophrenia | 72.5 | 70 to 74 | -0.063 | -0.087 | -0.040 |
| DALYs | China | Male   | Schizophrenia | 77.5 | 75 to 79 | -0.068 | -0.106 | -0.029 |
| DALYs | China | Female | Schizophrenia | 12.5 | 10 to 14 | -0.121 | -0.352 | 0.110  |
| DALYs | China | Female | Schizophrenia | 17.5 | 15 to 19 | -0.123 | -0.207 | -0.039 |
| DALYs | China | Female | Schizophrenia | 22.5 | 20 to 24 | -0.106 | -0.152 | -0.061 |
| DALYs | China | Female | Schizophrenia | 27.5 | 25 to 29 | -0.065 | -0.096 | -0.033 |
| DALYs | China | Female | Schizophrenia | 32.5 | 30 to 34 | -0.030 | -0.055 | -0.005 |
| DALYs | China | Female | Schizophrenia | 37.5 | 35 to 39 | -0.057 | -0.079 | -0.034 |
| DALYs | China | Female | Schizophrenia | 42.5 | 40 to 44 | -0.087 | -0.108 | -0.065 |
| DALYs | China | Female | Schizophrenia | 47.5 | 45 to 49 | -0.098 | -0.119 | -0.078 |
| DALYs | China | Female | Schizophrenia | 52.5 | 50 to 54 | -0.084 | -0.104 | -0.065 |
| DALYs | China | Female | Schizophrenia | 57.5 | 55 to 59 | -0.026 | -0.045 | -0.007 |
| DALYs | China | Female | Schizophrenia | 62.5 | 60 to 64 | 0.042  | 0.022  | 0.062  |
| DALYs | China | Female | Schizophrenia | 67.5 | 65 to 69 | 0.052  | 0.028  | 0.076  |
| DALYs | China | Female | Schizophrenia | 72.5 | 70 to 74 | 0.019  | -0.011 | 0.049  |
| DALYs | China | Female | Schizophrenia | 77.5 | 75 to 79 | 0.000  | -0.048 | 0.048  |
| DALYs | China | Both   | Schizophrenia | 12.5 | 10 to 14 | -0.114 | -0.297 | 0.070  |
| DALYs | China | Both   | Schizophrenia | 17.5 | 15 to 19 | -0.121 | -0.187 | -0.055 |
| DALYs | China | Both   | Schizophrenia | 22.5 | 20 to 24 | -0.114 | -0.149 | -0.079 |
| DALYs | China | Both   | Schizophrenia | 27.5 | 25 to 29 | -0.080 | -0.105 | -0.056 |
| DALYs | China | Both   | Schizophrenia | 32.5 | 30 to 34 | -0.037 | -0.057 | -0.017 |
| DALYs | China | Both   | Schizophrenia | 37.5 | 35 to 39 | -0.046 | -0.064 | -0.028 |
| DALYs | China | Both   | Schizophrenia | 42.5 | 40 to 44 | -0.065 | -0.083 | -0.048 |
| DALYs | China | Both   | Schizophrenia | 47.5 | 45 to 49 | -0.079 | -0.095 | -0.062 |
| DALYs | China | Both   | Schizophrenia | 52.5 | 50 to 54 | -0.086 | -0.102 | -0.069 |
| DALYs | China | Both   | Schizophrenia | 57.5 | 55 to 59 | -0.058 | -0.074 | -0.043 |
| DALYs | China | Both   | Schizophrenia | 62.5 | 60 to 64 | -0.006 | -0.022 | 0.011  |
| DALYs | China | Both   | Schizophrenia | 67.5 | 65 to 69 | 0.004  | -0.017 | 0.024  |
| DALYs | China | Both   | Schizophrenia | 72.5 | 70 to 74 | -0.024 | -0.050 | 0.002  |
| DALYs | China | Both   | Schizophrenia | 77.5 | 75 to 79 | -0.035 | -0.077 | 0.008  |
